# Supplementary material for: Natural exosome-like nanovesicles from edible tea flowers suppress metastatic breast cancer via ROS generation and microbiota modulation
Source: PubMed Central journal article supplement — Acta Pharm Sin B. 2021 Aug 18;12(2):907–23. doi: 10.1016/j.apsb.2021.08.016 (PMC8897038; doi:10.1016/j.apsb.2021.08.016), 2021-08-18
Supplement: mmc1.pdf [file mmc1.pdf]

## Supporting Information for

### ORIGINAL ARTICLE

# Natural exosome-like nanovesicles from edible tea flowers suppress metastatic breast cancer *via* ROS generation and microbiota modulation

Qiubing Chen<sup>a,b,†</sup>, Qian Li<sup>b,†</sup>, Yuqi Liang<sup>a</sup>, Menghang Zu<sup>a,b</sup>, Nanxi Chen<sup>a</sup>, Brandon S.B. Canup<sup>c</sup>, Liyong Luo<sup>d</sup>, Chenhui Wang<sup>e,\*</sup>, Liang Zeng<sup>d,\*</sup>, Bo Xiao<sup>a,b,\*</sup>

<sup>a</sup>State Key Laboratory of Silkworm Genome Biology, College of Sericulture, Textile, and Biomass Sciences, Southwest University, Chongqing 400715, China

<sup>b</sup>Chongqing Key Laboratory of Soft-Matter Material Chemistry and Function Manufacturing, School of Materials and Energy, Southwest University, Chongqing 400715, China

<sup>c</sup>Department of Chemistry, Center for Diagnostics and Therapeutics, Georgia State University, Atlanta, GA 30303, USA

<sup>d</sup>College of Food Science, Southwest University, Chongqing 400715, China

<sup>e</sup>Chongqing Key Laboratory of Natural Product Synthesis and Drug Research, School of Pharmaceutical Sciences, Chongqing University, Chongqing 401331, China

Received 15 April 2021; received in revised form 22 June 2021; accepted 5 July 2021

\*Corresponding authors. Tel./fax: +86 68254762 (Bo Xiao); +86 68250374 (Liang Zeng); +86 65678463 (Chenhui Wang).

E-mail addresses: bxiao@swu.edu.cn (Bo Xiao), zengliangbaby@126.com (Liang Zeng), wangchenhui@cqu.edu.cn (Chenhui Wang).<sup>†</sup>These authors made equal contributions to this work.

## 1. Experimental details

### 1.1. Physicochemical characterization of TFENs

The hydrodynamic particle size (nm), size distribution, and zeta potential (mV) of TFENs were characterized by using DLS instrument (Malvern, Nano ZS90, Worcestershire, UK).

The morphology of TFENs was visualized using a TEM (Zeiss, LEO 906E, Jena, Germany) after negatively stained with uranyl acetate (1%, w/v).

To evaluate the stability of TFENs in different sections of GIT and blood, they were suspended in simulated gastric fluid (pH = 1.2), simulated small intestinal fluid (pH = 7.4), simulated colonic fluid (pH = 6.8), and DMEM containing FBS (10%, v/v), respectively. After incubation for different time periods (0, 2, 4, and 8 h) at 37 °C, hydrodynamic particle size (nm) and zeta potential (mV) were determined by DLS measurements.

Total lipids were extracted from TFENs for lipidomic analysis, which was carried out by Shanghai Sensichip Infotech Co. (Shanghai, China). Briefly, TFEN suspension (100 µL, protein concentration: 3.0 µg/µL) was fully dissolved in a mixed solution (volume ratio of methyl tertiary butyl ether/methanol/water = 10:4:3, v/v, 2.0 mL), and centrifuged at 12,000×g for 20 min. The obtained supernatant was blow-dried and re-dissolved in a mixed solution (volume ratio of methanol/isopropanol = 1:1, v/v, 0.2 mL) for liquid chromatography-mass spectrometry (LC–MS, Thermo Fisher Scientific, Ultimate 3000LC, Q Exactive, San Jose, CA, USA) analysis. Finally, the results were analyzed using Lipid Search software (Thermo Fisher Scientific, Lipid Search software, San Jose, CA, USA), and the relative content of each lipid was displayed as the percentages of total lipids.

Isolated proteins from NTs were separated by sodium dodecyl sulfate-polyacrylamide gel electrophoresis (SDS-PAGE). The samples were shipped to Majorbio BioPharm Technology Co., Ltd. (shanghai, China) in dry ice. Proteins were identified and quantified by LC–MS/MS using an Orbitrap mass spectrometry (Thermo Fisher Scientific, Bremen, Germany). Finally, National Center for Biotechnology Information (NCBI) database was used to analyze the data.

To analyze the contents of polyphenols and flavonoid glycosides, total polyphenols and

flavonoid glycosides were extracted from TFENs, and the mixtures were centrifuged at  $3000\times g$  for 20 min. Finally, the obtained supernatants were submitted into high-performance liquid chromatography (HPLC, Shimadzu, Kyoto, Japan).

### *1.2. Cell culture*

Human breast cancer cell line (MCF-7 cell), mouse mammary carcinoma cell line (4T1), human lung carcinoma cell line (A549), human cervical cancer cell line (HeLa), human umbilical vein endothelial cell line (HUVEC), and human embryonic kidney cell line (HEK293T) were obtained from the Cell Bank of the Chinese Academy of Sciences (Shanghai, China). These cells were cultured in DMEM containing FBS (10%, *v/v*) and penicillin-streptomycin (1%, *w/v*) in CO<sub>2</sub> incubator at 37 °C.

### *1.3. In vitro cellular uptake profiles of TFENs*

To quantitatively and qualitatively investigate the cellular uptake profiles of TFENs, a green fluorescence probe (DiO) was used to label these NPs. DiO solution ( $1\times 10^{-5}$  mol/L) was added to TFEN suspension (protein concentration: 1 mg/mL, 1 mL). Subsequently, the mixture was incubated for 30 min at 37 °C. Finally, the free DiO was removed using a 100 kDa ultracentrifuge filter, and the purified DiO-labeled TFENs were obtained.

MCF-7 cells and 4T1 cells were seeded in 6-well plates at the same density of  $5 \times 10^5$  per well and incubated overnight. Thereafter, the complete culture medium was exchanged to serum-free medium containing DiO-labeled TFENs (protein concentration: 16 µg/mL). After co-incubation for different time intervals (1, 3, and 5 h), cells were washed 3 times with PBS to eliminate the excess NPs, collected, and re-suspended in PBS for flow cytometry (ACEA Novocyte™) analysis based on 10,000 gated cell events.

MCF-7 cells and 4T1 cells were seeded in 8-well plates (BD Falcon, MA, USA) at the same

cell density of  $8 \times 10^4$  cells per well and incubated overnight. Subsequently, the complete culture medium was exchanged to serum-free medium containing DiO-labeled TFENs (protein concentration: 16  $\mu\text{g}/\text{mL}$ ). After co-incubation for 5 h, cells were washed 3 times with PBS to eliminate the excess NPs and fixed with paraformaldehyde solution (4%, *v/v*) solution for 20 min. AF633-phalloidin and DAPI were used to stain cytoskeleton and nucleus, respectively. Finally, the fluorescent images of cells were acquired using a confocal laser scanning microscope (Zeiss).

#### *1.4. Trajectory analysis of TFENs*

DiO-TFENs were dispersed in the buffer (pH 6.8) to obtain different NP suspensions (0.1%, *w/v*). Meanwhile, mucus-simulating hydrogel (hydroxyethylcellulose, 0.2%, *w/v*) was added to petri dish as travelling medium. Subsequently, a drop of DiO-TFEN suspension was added to the petri dish, and the movements of DiO-TFENs were recorded by a CCD camera at a phase difference of about 30 fps with fluorescence microscope (Olympus IX83, Tokyo, Japan). The trajectories of DiO-TFENs were extracted to calculate the mean-square-displacement (MSD) values.

#### *1.5. Live/dead assay*

MCF-7 cells, 4T1 cells, A549 cells, and HeLa cells were seeded in 12-well plate at a density of  $2 \times 10^5$  cells per well and incubated overnight. Subsequently, cells were incubated with TFEN suspensions (protein concentration: 16  $\mu\text{g}/\text{mL}$ , 2 mL). After incubation for 24 h, cells were rinsed with PBS to eliminate the excess NPs and stained using a live/dead cell viability assay kit. Finally, their images were acquired immediately using a fluorescent microscope (Olympus, IX73, Tokyo, Japan).

#### *1.6. In vivo biodistribution*

To track the *in vivo* biodistribution of TFENs after intravenous injection (i.v.) or oral administration, a near-infrared fluorescence probe (DiR) was used to label TFENs. An orthotopic breast tumor model and a model of metastatic breast cancer were established and administered with DiR-labeled TFENs at an equivalent DiR concentration (3 mg protein/kg per mouse) *via* i.v. or oral route. After administration for 6, 12, 24, 48, and 72 h, respectively, mice were sacrificed to obtain tumors and main organs (heart, liver, spleen, lung, and kidney). The images were captured using an IVIS spectrum imaging system (PerkinElmer/Caliper LifeSciences, Hopkinton, MA, USA). Free DiR was treated as a control in this study.

#### *1.7. In vivo absorption site of TFENs after oral administration*

To determine the absorption sites of orally administered TFENs in gastrointestinal tract (GIT), DiO-labeled TFENs were administered to BALB/c mice *via* oral route. Six hours after oral administration, mice were sacrificed and their whole GIT (stomach, duodenum, jejunum, ileum, and colon) was harvested. Tissues were embedded in Optimal Cutting Temperature compound. Eventually, tissue sections (8  $\mu\text{m}$ ) were stained with DAPI, and their fluorescence images were obtained using a fluorescent microscope (Olympus).

#### *1.8. In vitro hemolysis assay*

Briefly, fresh blood was collected from the eyelid posterior sinus vein of mice and centrifuged at  $100 \times g$  for 20 min, washed 3 times, and suspended in PBS (2%, *v/v*). Meanwhile, TFENs with different concentrations (0.5–50  $\mu\text{g/mL}$ ) were co-cultured with erythrocytes solutions for 1 h at 37 °C prior to centrifugation at  $3000 \times g$  for 15 min. Finally, hemoglobin amounts in the supernatants were analyzed by spectrophotometric tests at 570 nm. The untreated erythrocyte suspension was utilized as a negative control, whereas erythrocyte suspension treated with Triton X-100 (1%, *w/v*) was used as a positive control.

### 1.9. *In vivo* biosafety evaluation

Female BALB/c mice (8 weeks) were orally or intravenously administered with TFENs at the same dose of 3 mg/kg every two days. After 7 doses of TFEN treatment, mice were sacrificed. The main organs (heart, liver, spleen, lung, and kidney) and blood were obtained, and the organ index was calculated. The concentrations of the main pro-inflammatory factors (TNF- $\alpha$ , IL-6, and IL-12), alkaline phosphatase (ALP), glutamic-pyruvic transaminase (ALT), glutamic-oxaloacetic transaminase (AST), urea nitrogen (BUN), creatinine (CRE), and complement C3 in plasma were measured using their corresponding kits, respectively. The whole blood components were analyzed by the hematology analyzer (Mindray Biomedical Electronics Co., Ltd., BC-5000VET, Shenzhen, Guangdong, China). In addition, the tissues of the main organs and different sections of GIT were analyzed by H&E staining.

### 1.10. *Survival rate*

To determine the survival rate of different mouse groups, mouse lung metastasis model of breast cancer was established, and these mice were randomly divided into 3 groups (10 mice per group). Mice were treated with TFENs (3 mg/kg) *via* i.v. injection or oral administration, respectively. The survival numbers of these 3 mouse groups were updated every day.

### 1.11. *Statistical analysis*

Data were presented as mean  $\pm$  standard error of mean (SEM). Statistical significance was analyzed using a Student's *t*-test for *in vitro* data processing and an ANOVA test for *in vivo* data processing. Statistical significance was represented by \* $P < 0.05$  and \*\* $P < 0.01$ .

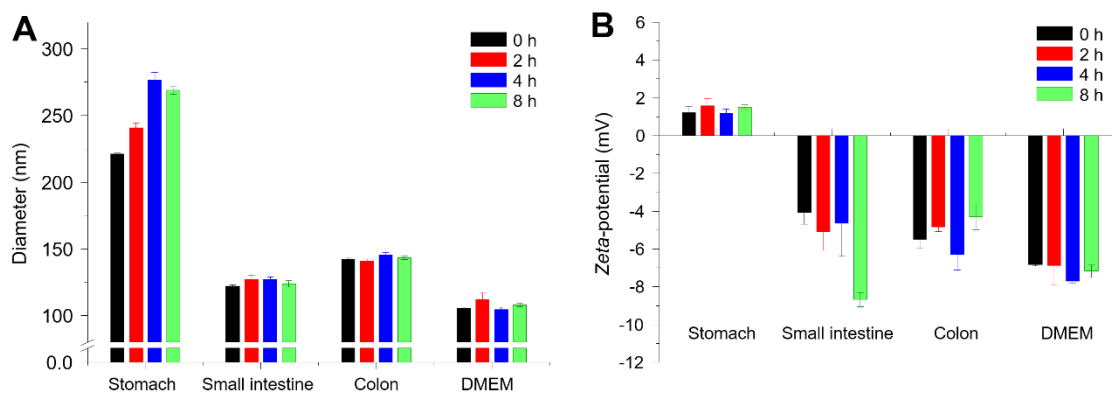

**Figure S1** The stabilities of TFENs in various buffers. (A) Particle size variations and (B) zeta potential variations ( $n=3$ ).

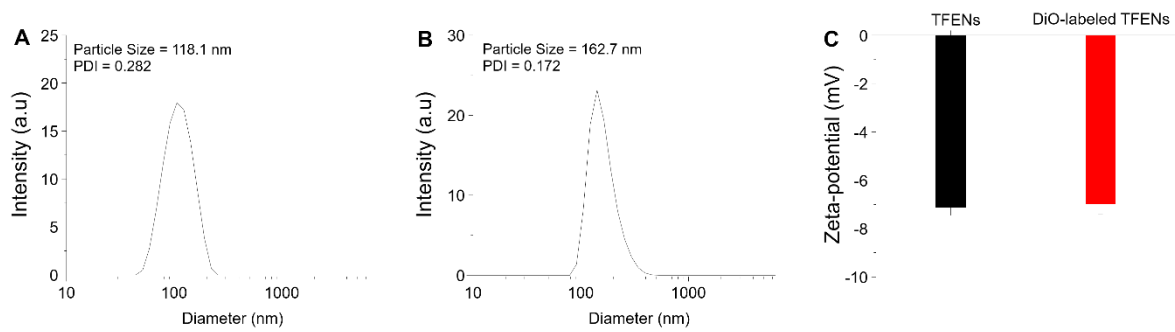

**Figure S2** The hydrodynamic particle sizes of (A) TFENs and (B) DiO-labeled TFENs and (C) their zeta potentials. Each point represents the mean  $\pm$  SEM ( $n = 3$ ).



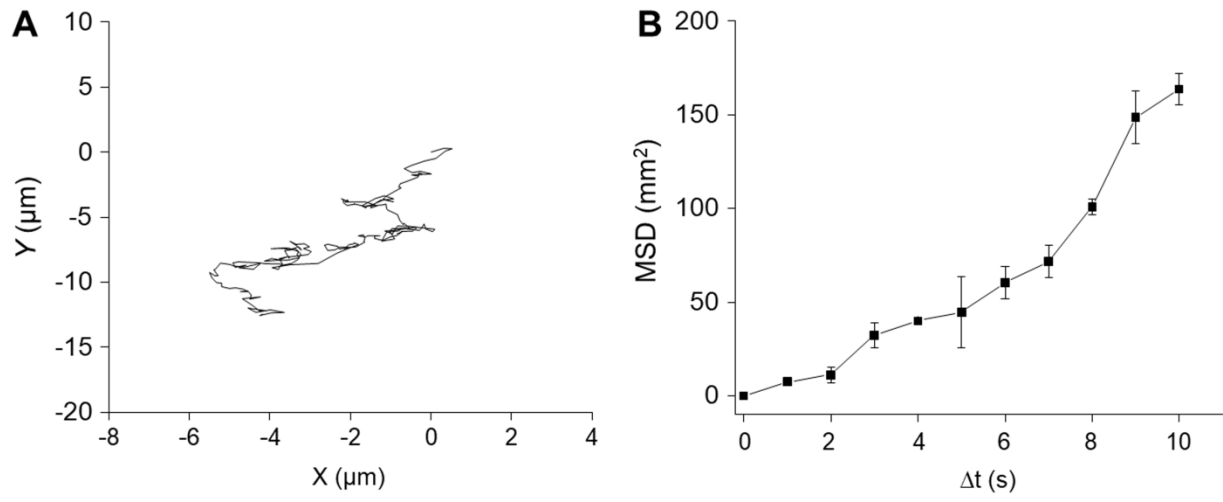

**Figure S3** The mucus penetration profile of TFENs. (A) Representative motion trajectories of TFENs. (B) Average MSD of TFENs in the mucus-simulating hydrogel ( $n = 3$ ).

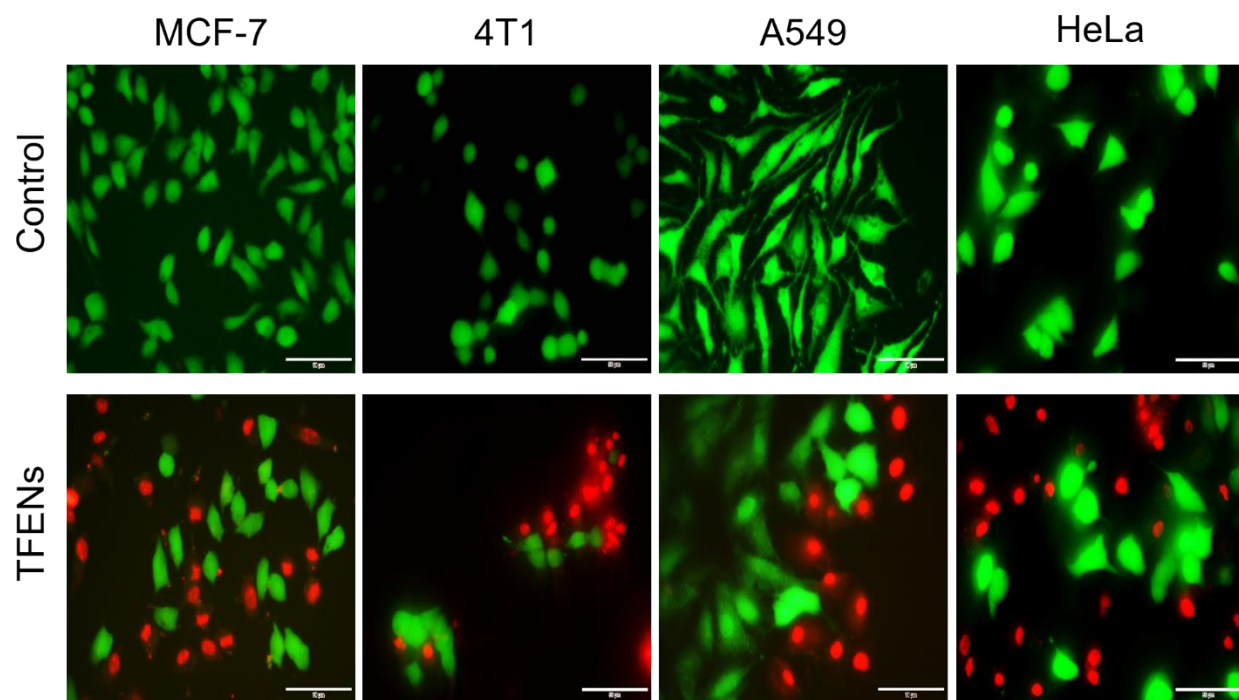

**Figure S4** Fluorescence images of TFEN-treated cancer cells with the staining of live/dead viability assay. The green and red dots denote live and dead cells, respectively (scale bar=50  $\mu\text{m}$ ).

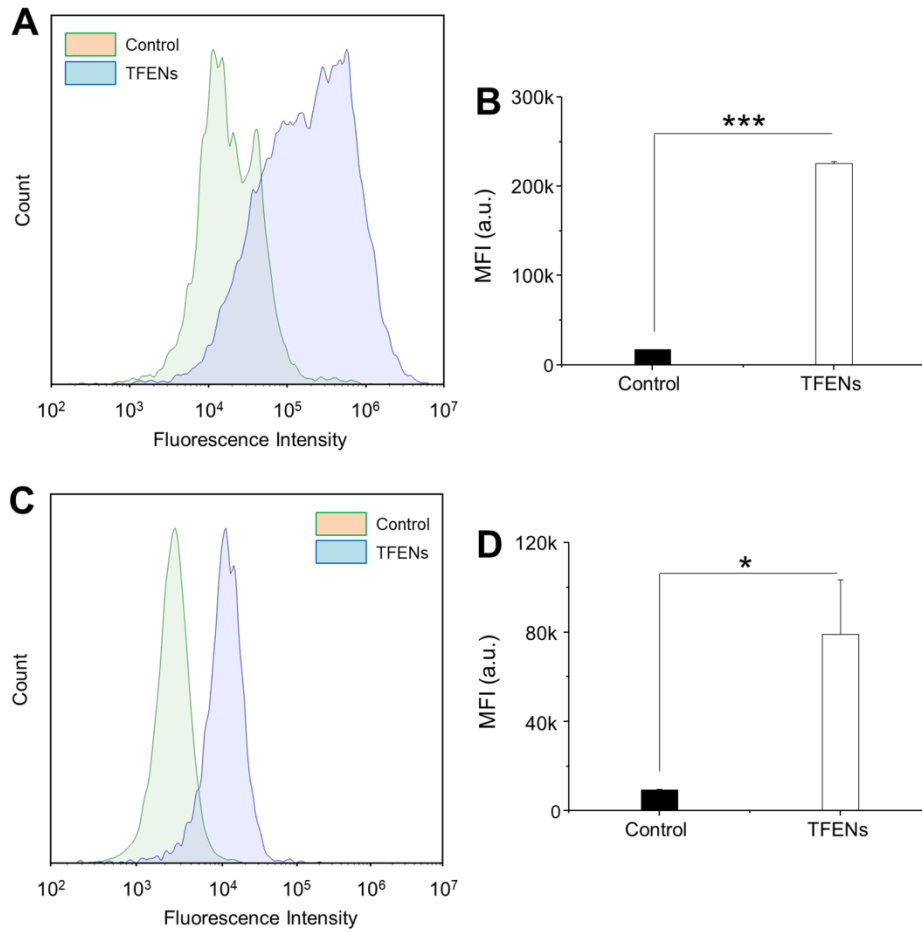

**Figure S5** FCM analysis of ROS amounts in (A, B) MCF-7 and (C,D) 4T1 cells after the treatment of TFEVs for 4 h. Each point represents the mean  $\pm$  SEM ( $n = 3$ ). \* $P < 0.05$ , \*\* $P < 0.01$ . ns, no significance).

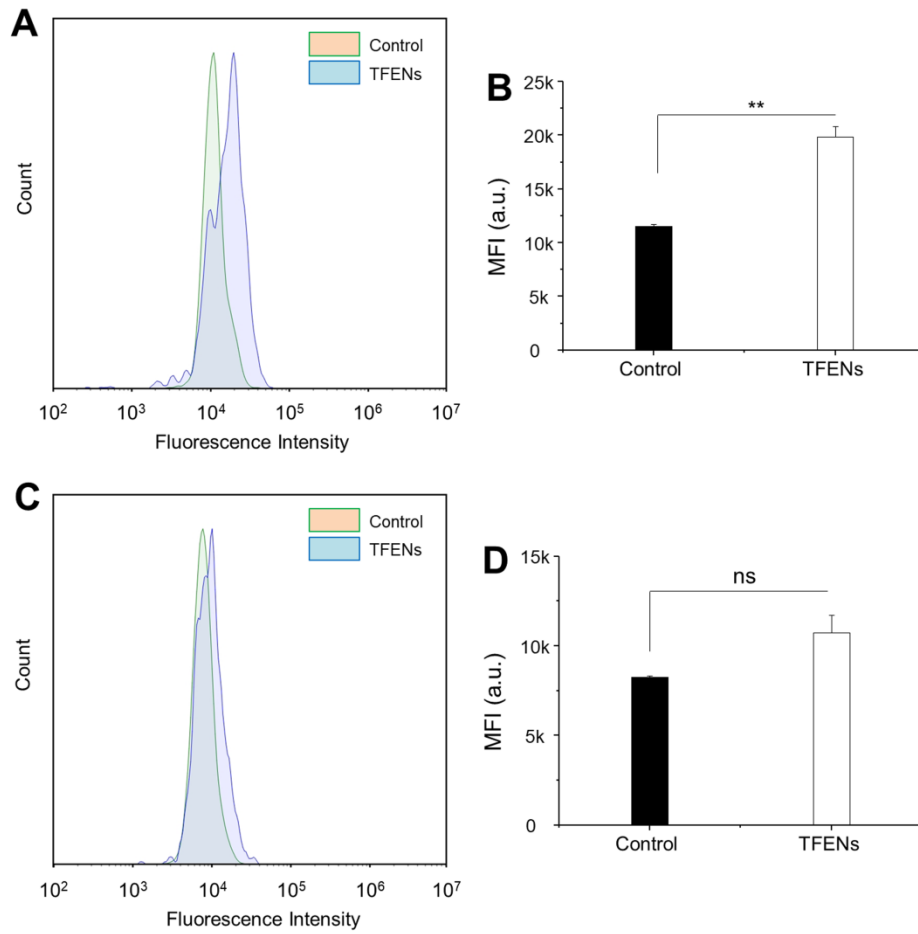

**Figure S6** FCM analysis of SA amounts in (A,B) MCF-7 and (C,D) 4T1 cells after the treatment of TFEVs for 4 h. Each point represents the mean  $\pm$  SEM ( $n = 3$ ).  $*P < 0.05$ ,  $**P < 0.01$ . ns, no significance.

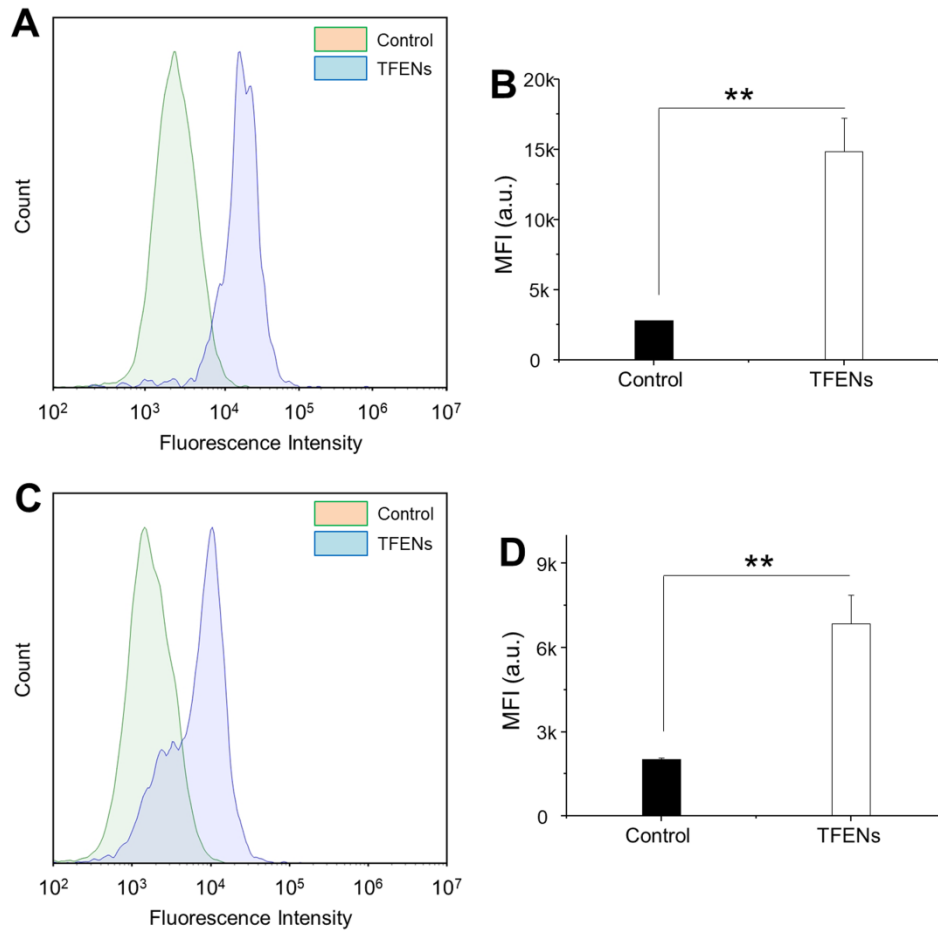

**Figure S7** FCM analysis of NO in (A,B) MCF-7 and (C,D) 4T1 cells after the treatment of TFEVs for 4 h. Each point represents the mean  $\pm$  SEM ( $n = 3$ ). \* $p < 0.05$ , \*\* $p < 0.01$ . ns, no significance.

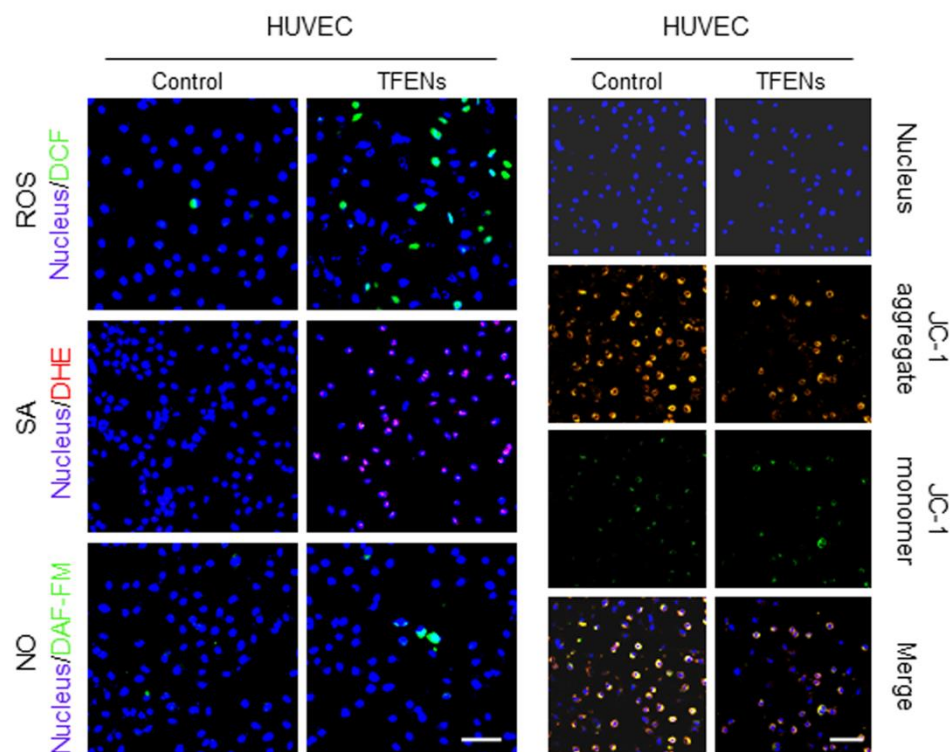

**Figure S8** Confocal microscopy images of ROS, SA, NO, and mitochondrial membrane potential changes in HUVEC cells after the treatment of TFENs for 4 h (scale bar: 50  $\mu$ m).

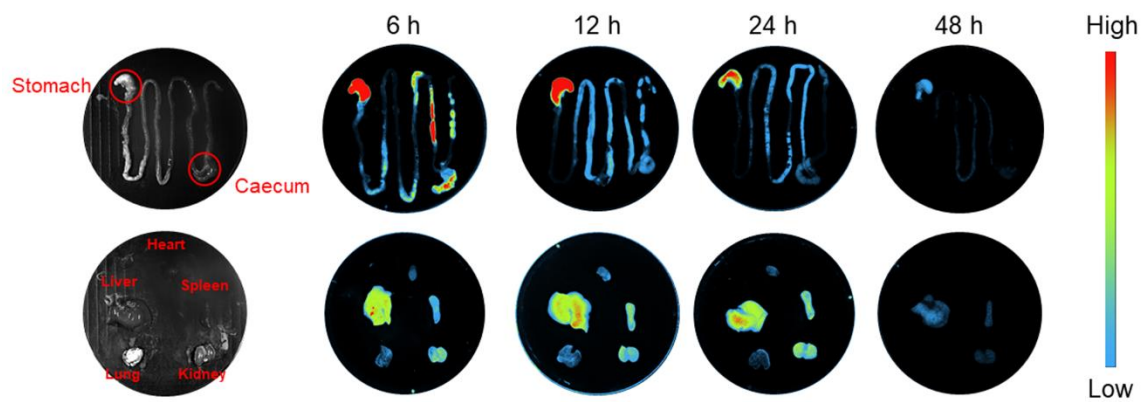

**Figure S9** *In vivo* bio-distribution of free DiR in various organs at different time points (6, 12, 24, and 48 h).

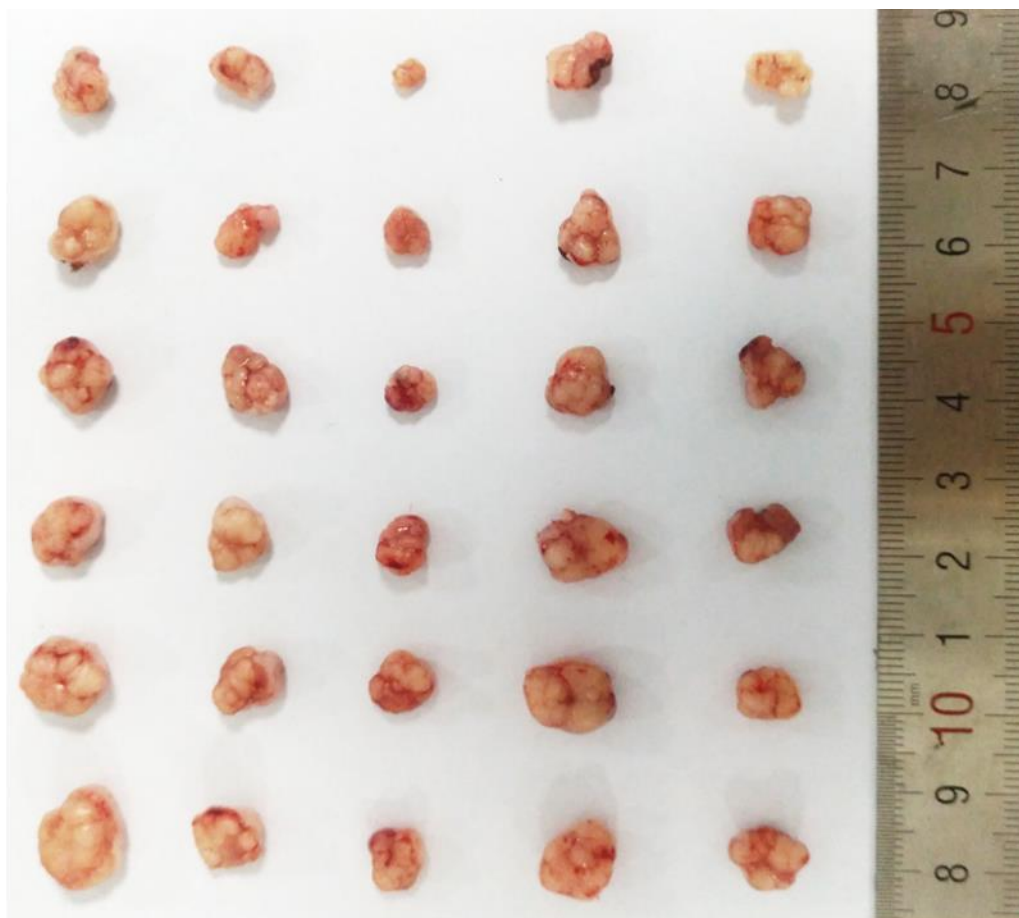

Control  
TFENS (i.v., low)  
TFENS (i.v., high)  
TFENS (oral, low)  
TFENS (oral, high)

**Figure S10** Photographs of the dissected tumor tissues on Day 9.



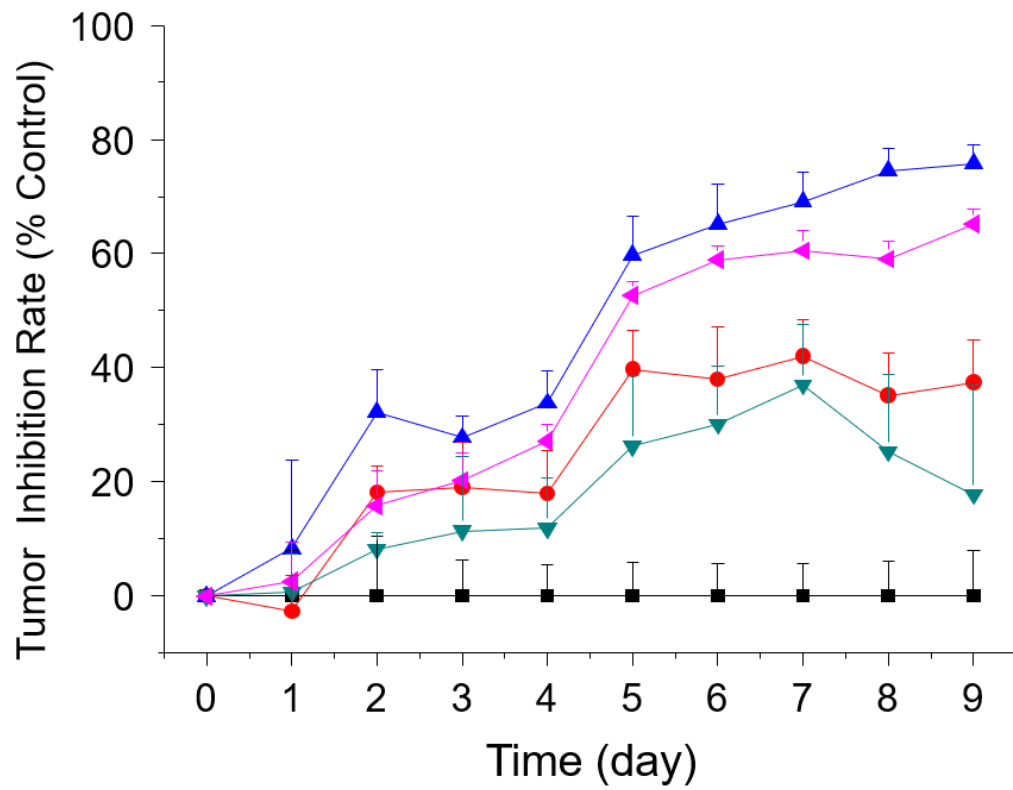

**Figure S11** Tumor inhibition rates of different treatment groups at the end of experiments. Each point represents the mean  $\pm$  SEM ( $n = 5$ ).

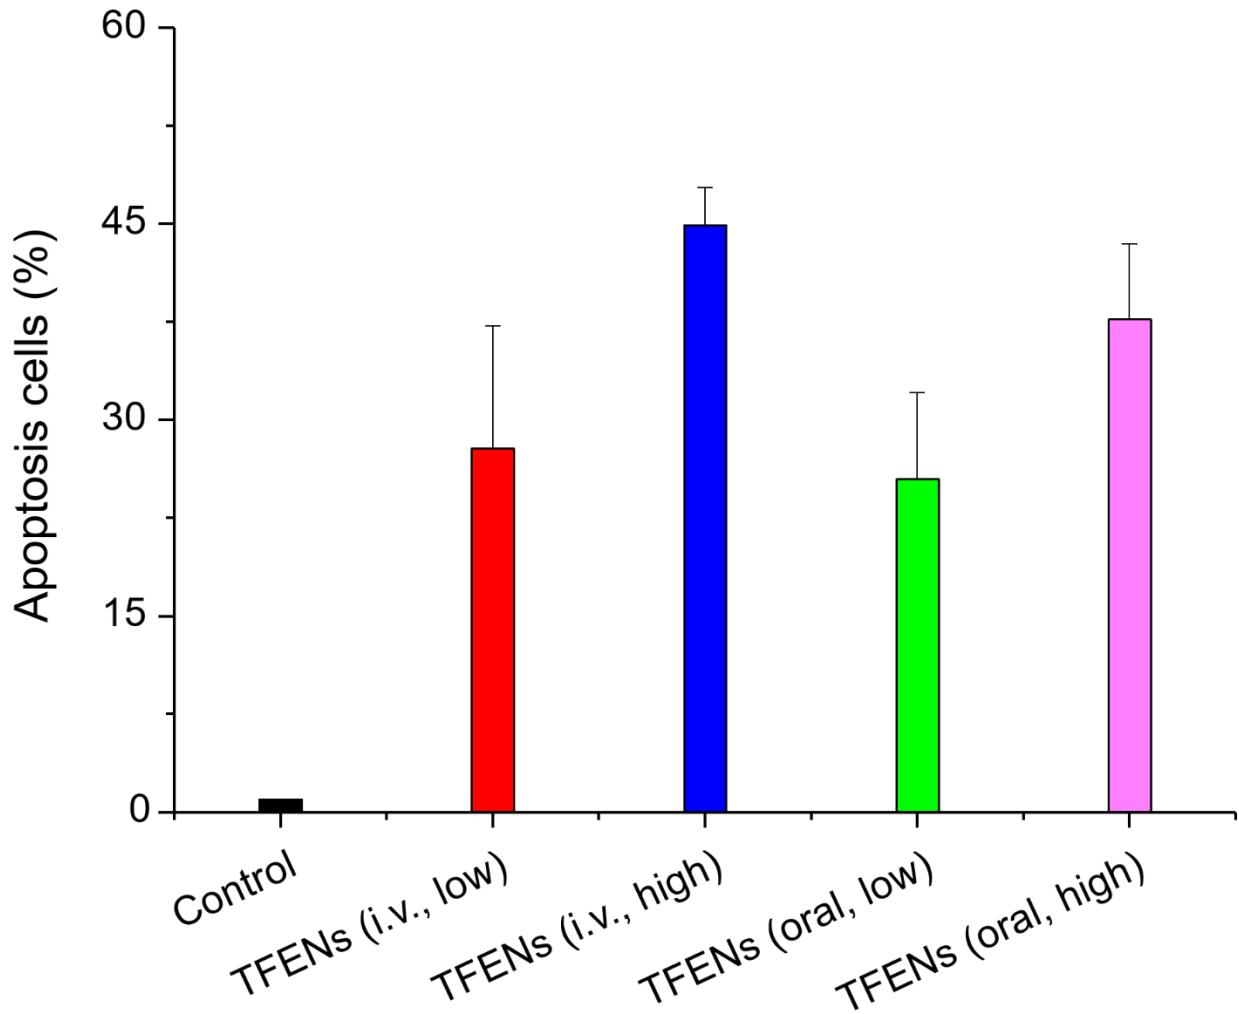

**Figure S12** Relative apoptotic cell percentages of tumor tissue sections from different treatment groups at the end of experiments. Each point represents the mean  $\pm$ SEM ( $n = 3$ ). \* $P < 0.05$ , \*\* $P < 0.01$ . ns, no significance.

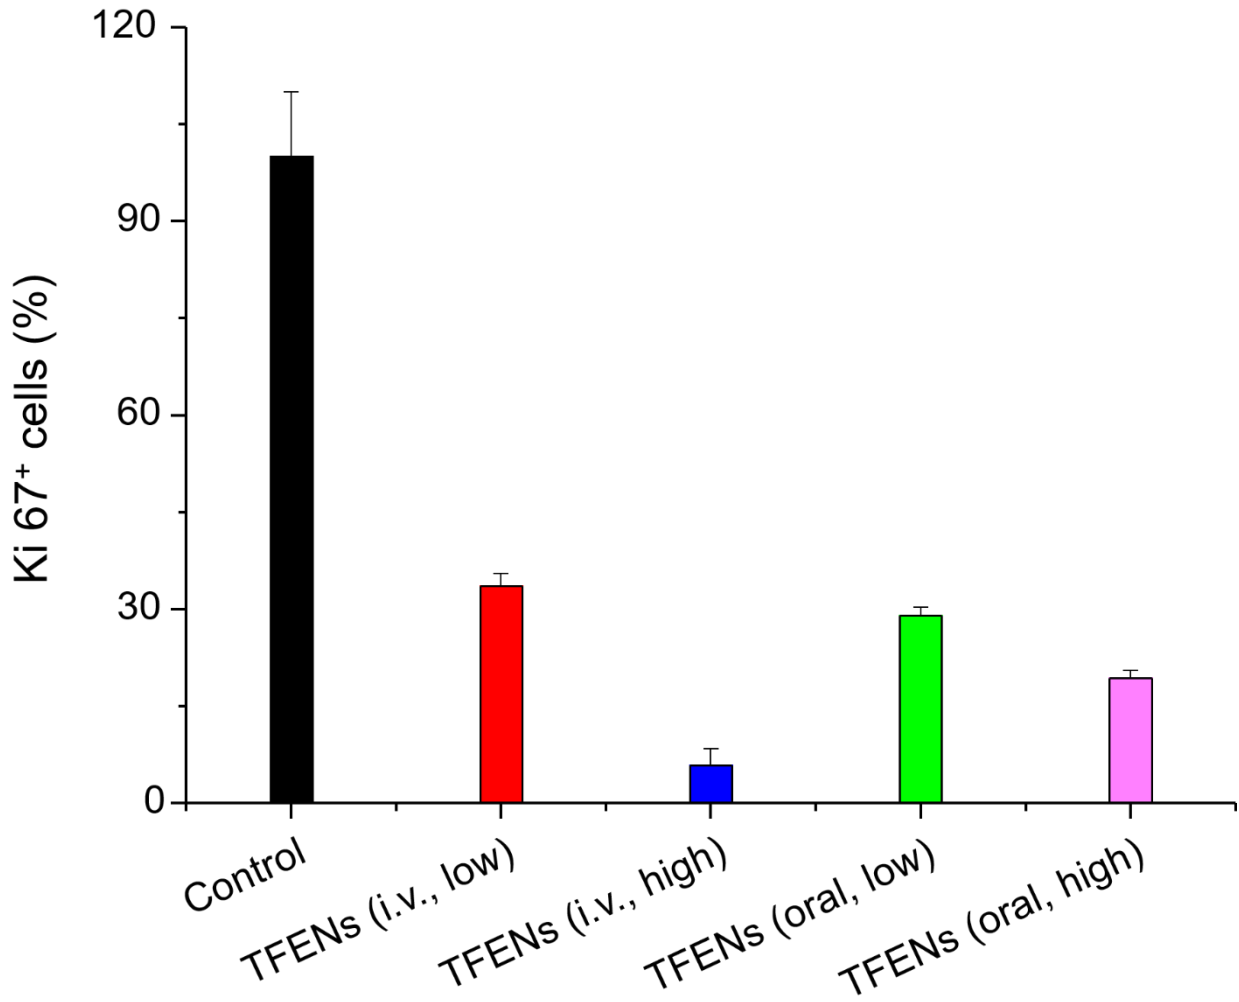

**Figure S13** Relative Ki67<sup>+</sup> cell percentages of tumor tissues sections from different treatment groups at the end of experiments. Each point represents the mean  $\pm$  SEM ( $n = 3$ ). \* $P < 0.05$ , \*\* $P < 0.01$ . ns, no significance.

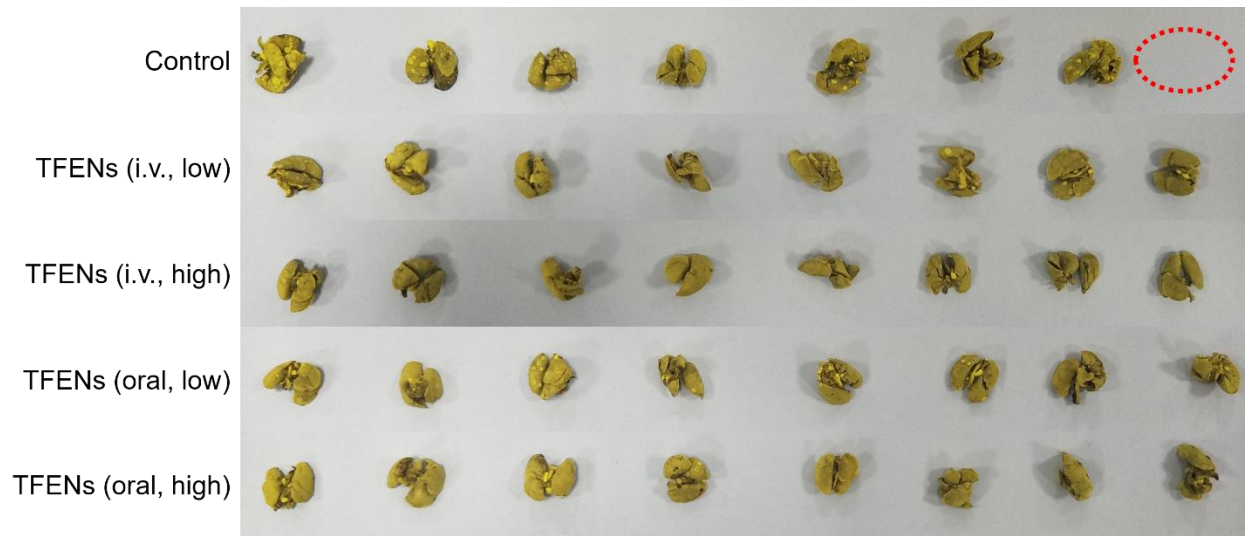

**Figure S14** Photograph of the dissected lungs from different treatment groups at the end of experiments.

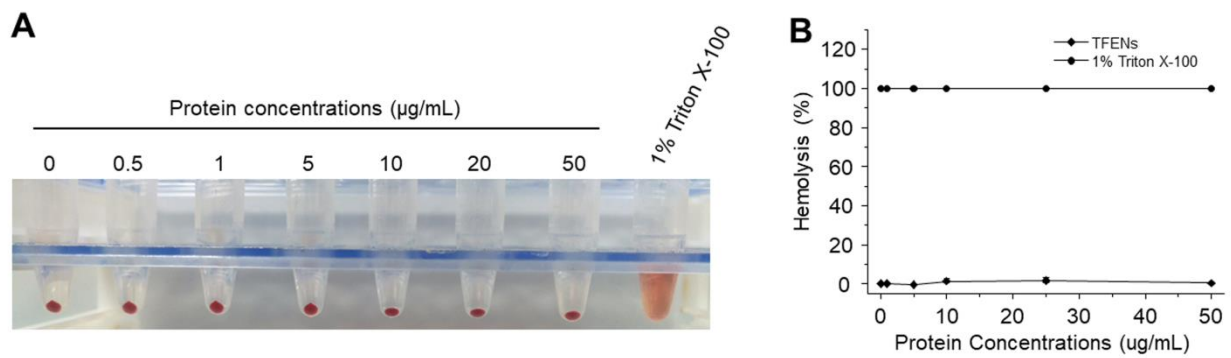

**Figure S15** (A) Digital photo and (B) hemolysis rates of erythrocytes after the treatment of Triton X-100 (positive control; 1%, *w/v*), PBS (negative control), and TFEVs under various protein concentrations. Each point represents the mean  $\pm$  SEM ( $n = 3$ ).

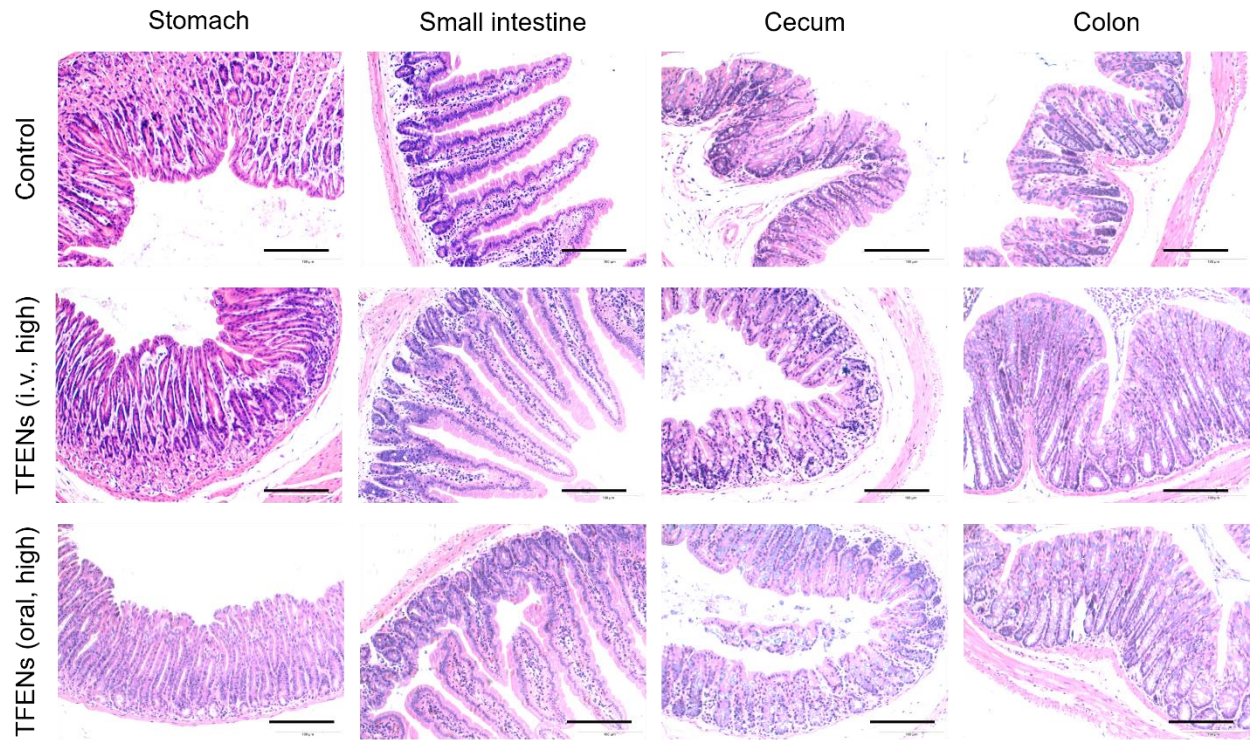

**Figure S16** H&E staining of different sections of the GIT (stomach, small intestine, cecum, and colon; scale bar=100 μm).

**Table S1** Lipid profiles of TFNPs.

| Lipid Ion              | Calc.<br><i>m/z</i> | Ret time (min) | Formula        | % of total lipid |
|------------------------|---------------------|----------------|----------------|------------------|
| Cer(d18:2/16:0+O)+H    | 552.498             | 6.7346         | C34 H66 O4 N1  | 0.0087           |
| Cer(d18:2/16:1)+H      | 534.488             | 6.6670         | C34 H64 O3 N1  | 0.0951           |
| Cer(d18:2/18:1)+H      | 562.519             | 7.4940         | C36 H68 O3 N1  | 0.0340           |
| Cer(d18:2/20:1)+H      | 590.550             | 7.9930         | C38 H72 O3 N1  | 0.0042           |
| Cer(d18:2/24:1)+H      | 646.613             | 8.9763         | C42 H80 O3 N1  | 0.0138           |
| Cer(d20:2/18:2+O)+H    | 604.529             | 8.4977         | C38 H70 O4 N1  | 0.0279           |
| Cer(d22:2/18:2+O)+H    | 632.561             | 8.9815         | C40 H74 O4 N1  | 0.0351           |
| Total Cer              |                     |                |                | 0.2189           |
| CerG1(d16:0/18:1+2O)+H | 732.562             | 6.4260         | C40 H78 O10 N1 | 0.0115           |
| CerG1(d18:2/16:0+O)+H  | 714.551             | 6.7480         | C40 H76 O9 N1  | 0.0622           |
| CerG1(d18:2/16:1)+H    | 696.540             | 6.7726         | C40 H74 O8 N1  | 0.3354           |
| CerG1(d18:2/18:0+O)+H  | 742.582             | 7.3858         | C42 H80 O9 N1  | 0.0282           |
| CerG1(d18:2/18:1)+H    | 724.572             | 7.4914         | C42 H78 O8 N1  | 0.1209           |
| CerG1(d18:2/20:0+O)+H  | 770.614             | 7.9827         | C44 H84 O9 N1  | 0.0038           |
| CerG1(d18:2/20:1)+H    | 752.603             | 7.9775         | C44 H82 O8 N1  | 0.0172           |
| CerG1(d18:2/22:1)+H    | 780.634             | 8.5056         | C46 H86 O8 N1  | 0.0282           |
| CerG1(d18:2/24:0)+H    | 810.681             | 9.1790         | C48 H92 O8 N1  | 0.0107           |
| CerG1(d18:2/24:1)+H    | 808.666             | 8.9463         | C48 H90 O8 N1  | 0.0524           |
| CerG1(d18:2/24:2)+H    | 806.650             | 8.5277         | C48 H88 O8 N1  | 0.0093           |

|                           |         |        |                    |        |
|---------------------------|---------|--------|--------------------|--------|
| CerG1(d18:2/26:1)+H       | 836.697 | 9.3981 | C50 H94 O8 N1      | 0.0139 |
| CerG1(d20:0/18:1+2O)+H    | 788.624 | 7.8817 | C44 H86 O10 N1     | 0.0691 |
| CerG1(d20:1/20:1+O)+H     | 798.645 | 8.5354 | C46 H88 O9 N1      | 0.0085 |
| CerG1(d22:0/18:0+2O)+Na   | 840.653 | 7.8895 | C46 H91 O10 N1 Na1 | 0.0088 |
| CerG1(d22:0/18:1+2O)+H    | 816.655 | 8.3997 | C46 H90 O10 N1     | 0.2076 |
| CerG1(d22:0/18:1+O)+H     | 800.661 | 8.5003 | C46 H90 O9 N1      | 0.0076 |
| CerG1(d22:0/18:2+2O)+H    | 814.640 | 7.8004 | C46 H88 O10 N1     | 0.0177 |
| CerG1(d22:1/20:1+O)+H     | 826.676 | 8.9737 | C48 H92 O9 N1      | 0.0216 |
| CerG1(d24:0/18:1+2O)+H    | 844.687 | 8.7713 | C48 H94 O10 N1     | 0.1517 |
| CerG1(d24:0/18:1+O)+H     | 828.692 | 8.9437 | C48 H94 O9 N1      | 0.0128 |
| CerG1(d24:0/18:2+2O)+H    | 842.671 | 8.4283 | C48 H92 O10 N1     | 0.1065 |
| CerG1(d25:0/16:1+2O)+H    | 830.671 | 8.5628 | C47 H92 O10 N1     | 0.0248 |
| CerG1(d25:0/18:1+2O)+H    | 858.702 | 9.0315 | C49 H96 O10 N1     | 0.0149 |
| CerG1(d25:0/18:2+2O)+H    | 856.687 | 8.5970 | C49 H94 O10 N1     | 0.0112 |
| Total CerG1               |         |        |                    | 1.3565 |
| CerP(d12:0/10:0)+H        | 452.313 | 4.9160 | C22 H47 O6 N1 P1   | 0.0012 |
| Total CerP                |         |        |                    | 0.0012 |
| CL(18:2/16:0/16:0/20:1)-H | 1430.01 | 7.5121 | C79 H147 O17 P2    | 0.0362 |
| CL(18:2/16:0/16:0/22:4)-H | 1451.99 | 7.5229 | C81 H145 O17 P2    | 0.0277 |
| CL(23:1/16:0/16:0/18:2)-H | 1472.05 | 7.5202 | C82 H153 O17 P2    | 0.0348 |
| CL(9:0/12:0/12:0/16:0)-H  | 1141.73 | 9.4554 | C58 H111 O17 P2    | 0.0447 |
| Total CL                  |         |        |                    | 0.1434 |



|                               |         |         |               |        |
|-------------------------------|---------|---------|---------------|--------|
| Co(Q10)+H                     | 863.691 | 10.6280 | C59 H91 O4    | 0.0714 |
| Co(Q10)+NH <sub>4</sub>       | 880.717 | 10.6554 | C59 H94 O4 N1 | 0.0340 |
| Total Co                      |         |         |               | 0.1054 |
| DG(16:0/18:2)+H               | 593.514 | 7.2004  | C37 H69 O5    | 0.0218 |
| DG(16:0/18:2)+NH <sub>4</sub> | 610.540 | 8.5576  | C37 H72 O5 N1 | 0.1688 |
| DG(16:0/18:3)+H               | 591.498 | 6.7214  | C37 H67 O5    | 0.0755 |
| DG(16:0/18:3)+NH <sub>4</sub> | 608.524 | 8.2755  | C37 H70 O5 N1 | 0.0837 |
| DG(18:0/18:2)+NH <sub>4</sub> | 638.571 | 9.0993  | C39 H76 O5 N1 | 0.0097 |
| DG(18:0/18:3)+NH <sub>4</sub> | 636.556 | 8.7491  | C39 H74 O5 N1 | 0.0070 |
| DG(18:1/18:2)+NH <sub>4</sub> | 636.556 | 8.6165  | C39 H74 O5 N1 | 0.0226 |
| DG(18:1/18:3)+H               | 617.514 | 7.3560  | C39 H69 O5    | 0.0111 |
| DG(18:2/18:2)+NH <sub>4</sub> | 634.540 | 8.1939  | C39 H72 O5 N1 | 0.1255 |
| DG(18:3/18:2)+H               | 615.498 | 7.7952  | C39 H67 O5    | 0.0694 |
| DG(18:3/18:2)+NH <sub>4</sub> | 632.524 | 7.7785  | C39 H70 O5 N1 | 0.0853 |
| DG(18:3/18:3)+H               | 613.482 | 6.4742  | C39 H65 O5    | 0.3057 |
| DG(18:3/18:3)+NH <sub>4</sub> | 630.509 | 7.3586  | C39 H68 O5 N1 | 0.0326 |
| DG(18:4/16:0)+H               | 589.482 | 4.8112  | C37 H65 O5    | 0.0010 |
| DG(24:0/18:3)+NH <sub>4</sub> | 720.650 | 10.0035 | C45 H86 O5 N1 | 0.0032 |
| Total DG                      |         |         |               | 1.0231 |
| DGDG(16:0/18:1)+HCOO          | 963.626 | 7.6620  | C50 H91 O17   | 0.1259 |
| DGDG(16:0/18:1)-H             | 917.620 | 7.6753  | C49 H89 O15   | 0.0246 |
| DGDG(16:0/18:2)+HCOO          | 961.610 | 7.2822  | C50 H89 O17   | 1.4550 |

---

|                      |         |        |              |        |
|----------------------|---------|--------|--------------|--------|
| DGDG(16:0/18:2)-H    | 915.605 | 7.2494 | C49 H87 O15  | 0.2921 |
| DGDG(16:0/18:3)+HCOO | 959.594 | 6.8155 | C50 H87 O17  | 0.9202 |
| DGDG(16:0/18:3)-H    | 913.589 | 6.7305 | C49 H85 O15  | 0.1911 |
| DGDG(16:0/26:2)+HCOO | 1073.73 | 9.4475 | C58 H105 O17 | 0.1208 |
| DGDG(16:0/26:3)+HCOO | 1071.72 | 9.2080 | C58 H103 O17 | 0.0703 |
| DGDG(16:0/26:3)-H    | 1025.71 | 8.6472 | C57 H101 O15 | 0.0611 |
| DGDG(18:0/18:1)+HCOO | 991.657 | 8.2263 | C52 H95 O17  | 0.0171 |
| DGDG(18:0/18:2)+HCOO | 989.641 | 7.7607 | C52 H93 O17  | 0.1797 |
| DGDG(18:0/18:2)-H    | 943.636 | 7.7962 | C51 H91 O15  | 0.0271 |
| DGDG(18:0/18:3)+HCOO | 987.626 | 7.3808 | C52 H91 O17  | 0.1355 |
| DGDG(18:0/26:1)-H    | 1057.77 | 9.5568 | C59 H109 O15 | 0.0384 |
| DGDG(18:1/18:2)+HCOO | 987.626 | 7.2572 | C52 H91 O17  | 0.1037 |
| DGDG(18:1/18:2)-H    | 941.620 | 7.3031 | C51 H89 O15  | 0.0216 |
| DGDG(18:1/18:3)+HCOO | 985.610 | 6.8812 | C52 H89 O17  | 0.3382 |
| DGDG(18:2/18:2)+HCOO | 985.610 | 6.7412 | C52 H89 O17  | 0.3382 |
| DGDG(18:2/18:2)-H    | 939.605 | 6.7956 | C51 H87 O15  | 0.0604 |
| DGDG(18:2/18:3)+HCOO | 983.594 | 6.3525 | C52 H87 O17  | 0.1657 |
| DGDG(18:2/18:3)-H    | 937.589 | 6.2670 | C51 H85 O15  | 0.0328 |
| DGDG(18:2/20:1)+HCOO | 1015.65 | 7.8318 | C54 H95 O17  | 0.0259 |
| DGDG(18:2/23:0)+HCOO | 1059.72 | 9.0263 | C57 H103 O17 | 0.0316 |
| DGDG(18:2/24:0)+HCOO | 1073.73 | 9.1697 | C58 H105 O17 | 0.2034 |
| DGDG(18:2/25:0)+HCOO | 1087.75 | 9.3924 | C59 H107 O17 | 0.0273 |

---

|                      |         |         |                  |        |
|----------------------|---------|---------|------------------|--------|
| DGDG(18:2/26:0)+HCOO | 1101.76 | 9.5791  | C60 H109 O17     | 0.0356 |
| DGDG(18:2/26:2)+HCOO | 1097.7  | 9.2026  | C60 H105 O17     | 0.1129 |
| DGDG(18:2/28:0)+HCOO | 1129.79 | 9.9529  | C62 H113 O17     | 0.0171 |
| DGDG(18:2/28:5)+HCOO | 1119.72 | 8.6831  | C62 H103 O17     | 0.0173 |
| DGDG(18:3/18:3)+HCOO | 981.579 | 5.8011  | C52 H85 O17      | 0.6447 |
| DGDG(18:3/18:3)-H    | 935.573 | 5.7201  | C51 H83 O15      | 0.1231 |
| DGDG(18:3/24:0)+HCOO | 1071.72 | 8.8964  | C58 H103 O17     | 0.0424 |
| DGDG(24:0/24:0)-H    | 1115.85 | 10.4209 | C63 H119 O15     | 0.0246 |
| Total DGDG           |         |         |                  | 6.0255 |
| dMePE(16:0/20:4)+H   | 768.553 | 7.1142  | C43 H79 O8 N1 P1 | 0.0027 |
| dMePE(18:2/18:2)-H   | 766.539 | 7.0509  | C43 H77 O8 N1 P1 | 0.0603 |
| dMePE(18:3/18:2)-H   | 764.523 | 6.5598  | C43 H75 O8 N1 P1 | 0.0161 |
| dMePE(20:2/18:2)-H   | 794.570 | 8.1986  | C45 H81 O8 N1 P1 | 0.0294 |
| Total dMePE          |         |         |                  | 0.1085 |
| LPC(16:0)+H          | 496.339 | 2.2394  | C24 H51 O7 N1 P1 | 0.0015 |
| LPC(18:2)+H          | 520.33  | 1.6909  | C26 H51 O7 N1 P1 | 0.0017 |
| Total LPC            |         |         |                  | 0.0032 |
| LPE(16:0)-H          | 452.278 | 2.1738  | C21 H43 O7 N1 P1 | 0.0088 |
| LPE(16:0)+H          | 454.292 | 2.1962  | C21 H45 O7 N1 P1 | 0.0005 |
| Total LPE            |         |         |                  | 0.0092 |
| MG(21:6)+H           | 389.268 | 9.5682  | C24 H37 O4       | 0.0624 |
| Total MG             |         |         |                  | 0.0624 |

|                               |         |        |                         |        |
|-------------------------------|---------|--------|-------------------------|--------|
| MGDG(16:0/18:1)+HCOO          | 801.573 | 8.2013 | C44 H81 O12             | 0.0153 |
| MGDG(16:0/18:2)+HCOO          | 799.557 | 7.7277 | C44 H79 O12             | 0.1422 |
| MGDG(16:0/18:3)+HCOO          | 797.542 | 7.3203 | C44 H77 O12             | 0.1178 |
| MGDG(18:0/18:3)+HCOO          | 825.573 | 7.9580 | C46 H81 O12             | 0.0116 |
| MGDG(18:2/18:2)+HCOO          | 823.557 | 7.3308 | C46 H79 O12             | 0.1647 |
| MGDG(18:2/18:3)+HCOO          | 821.54  | 6.8864 | C46 H77 O12             | 0.1480 |
| MGDG(18:3/18:3)+HCOO          | 819.526 | 6.4105 | C46 H75 O12             | 1.8956 |
| MGDG(18:3/18:3)-H             | 773.520 | 6.3960 | C45 H73 O10             | 0.0451 |
| Total MGDG                    |         |        |                         | 2.5404 |
| PA(16:0/18:2)+H               | 673.480 | 7.5919 | C37 H70 O8 N0 P1        | 0.0098 |
| PA(16:0/18:2)+Na              | 695.462 | 8.0349 | C37 H69 O8 N0 P1<br>Na1 | 0.1073 |
| PA(16:0/18:2)+NH <sub>4</sub> | 690.506 | 7.3105 | C37 H73 O8 N1 P1        | 0.1745 |
| PA(16:0/20:4)+H               | 697.480 | 7.1511 | C39 H70 O8 N0 P1        | 0.0251 |
| PA(16:0/20:4)+Na              | 719.462 | 6.6722 | C39 H69 O8 N0 P1<br>Na1 | 0.0776 |
| PA(16:0/20:4)+NH <sub>4</sub> | 714.506 | 6.8680 | C39 H73 O8 N1 P1        | 0.0748 |
| PA(16:1/18:2)+H               | 671.464 | 6.9577 | C37 H68 O8 N0 P1        | 0.0530 |
| PA(16:1/18:2)+Na              | 693.446 | 6.8238 | C37 H67 O8 N0 P1<br>Na1 | 0.0257 |
| PA(16:1/18:2)+NH <sub>4</sub> | 688.491 | 6.6696 | C37 H71 O8 N1 P1        | 0.0744 |
| PA(16:1/20:4)+H               | 695.464 | 6.3910 | C39 H68 O8 N0 P1        | 0.0535 |
| PA(16:1/20:4)+Na              | 717.446 | 6.1788 | C39 H67 O8 N0 P1        | 0.0157 |

---

|                               |         |        | NaI                     |        |
|-------------------------------|---------|--------|-------------------------|--------|
| PA(16:1/20:4)+NH <sub>4</sub> | 712.491 | 6.2612 | C39 H71 O8 N1 P1        | 0.0640 |
| PA(16:1/20:5)+H               | 693.449 | 5.8157 | C39 H66 O8 N0 P1        | 0.0062 |
| PA(16:1/20:5)+NH <sub>4</sub> | 710.475 | 5.7626 | C39 H69 O8 N1 P1        | 0.0057 |
| PA(16:0/18:2)-H               | 671.465 | 7.9953 | C37 H68 O8 N0 P1        | 3.3439 |
| PA(16:0/18:3)-H               | 669.450 | 6.6348 | C37 H66 O8 N0 P1        | 1.3177 |
| PA(18:2/18:2)-H               | 695.465 | 8.1044 | C39 H68 O8 N0 P1        | 2.3714 |
| PA(18:3/18:2)-H               | 693.450 | 6.4730 | C39 H66 O8 N0 P1        | 1.1922 |
| PA(18:3/18:3)-H               | 691.434 | 5.7400 | C39 H64 O8 N0 P1        | 0.1727 |
| Total PA                      |         |        |                         | 9.1652 |
| PC(15:0/18:2)+H               | 744.553 | 7.2057 | C41 H79 O8 N1 P1        | 0.0139 |
| PC(15:0/20:4)+H               | 768.553 | 6.7320 | C43 H79 O8 N1 P1        | 0.0113 |
| PC(15:1/18:2)+H               | 742.538 | 6.7072 | C41 H77 O8 N1 P1        | 0.0095 |
| PC(15:1/20:4)+H               | 766.538 | 6.1815 | C43 H77 O8 N1 P1        | 0.0019 |
| PC(16:0/16:0)+H               | 734.569 | 8.0077 | C40 H81 O8 N1 P1        | 0.0073 |
| PC(16:0/16:1)+H               | 732.553 | 7.4558 | C40 H79 O8 N1 P1        | 0.0101 |
| PC(16:0/18:1)+H               | 760.585 | 8.3664 | C42 H83 O8 N1 P1        | 0.3319 |
| PC(16:0/18:1)+Na              | 782.567 | 8.1547 | C42 H82 O8 N1 P1<br>NaI | 0.0744 |
| PC(16:0/18:2)+H               | 758.569 | 8.2535 | C42 H81 O8 N1 P1        | 5.8974 |
| PC(16:0/18:2)+Na              | 780.551 | 7.5241 | C42 H80 O8 N1 P1<br>NaI | 1.1396 |
| PC(16:0/19:3)+H               | 770.569 | 7.4131 | C43 H81 O8 N1 P1        | 0.0184 |

---

---

|                  |         |        |                         |        |
|------------------|---------|--------|-------------------------|--------|
| PC(16:0/20:4)+H  | 782.569 | 7.1064 | C44 H81 O8 N1 P1        | 3.9925 |
| PC(16:0/20:4)+Na | 804.551 | 7.1285 | C44 H80 O8 N1 P1<br>Na1 | 0.7700 |
| PC(16:0/24:2)+H  | 842.663 | 9.6243 | C48 H93 O8 N1 P1        | 0.0120 |
| PC(16:1/16:1)+H  | 730.538 | 6.8212 | C40 H77 O8 N1 P1        | 0.0073 |
| PC(16:1/16:2)+H  | 728.52  | 6.2741 | C40 H75 O8 N1 P1        | 0.0019 |
| PC(16:1/18:2)+H  | 756.553 | 7.5685 | C42 H79 O8 N1 P1        | 1.8708 |
| PC(16:1/18:2)+Na | 778.535 | 7.2173 | C42 H78 O8 N1 P1<br>Na1 | 0.3365 |
| PC(16:1/20:4)+H  | 780.553 | 6.9279 | C44 H79 O8 N1 P1        | 1.4259 |
| PC(16:1/20:4)+Na | 802.535 | 6.7137 | C44 H78 O8 N1 P1<br>Na1 | 0.0326 |
| PC(16:1/20:5)+H  | 778.538 | 6.2664 | C44 H77 O8 N1 P1        | 0.1825 |
| PC(16:1/20:5)+Na | 800.520 | 5.9320 | C44 H76 O8 N1 P1<br>Na1 | 0.0278 |
| PC(17:0/18:2)+H  | 772.585 | 7.8869 | C43 H83 O8 N1 P1        | 0.0114 |
| PC(17:1/18:2)+H  | 770.569 | 7.2680 | C43 H81 O8 N1 P1        | 0.0184 |
| PC(18:0/18:2)+H  | 786.600 | 8.1846 | C44 H85 O8 N1 P1        | 0.1088 |
| PC(18:0/18:2)+Na | 808.582 | 8.2483 | C44 H84 O8 N1 P1<br>Na1 | 0.0043 |
| PC(18:0/20:4)+H  | 810.600 | 7.6739 | C46 H85 O8 N1 P1        | 0.1040 |
| PC(18:0/24:2)+H  | 870.694 | 9.9906 | C50 H97 O8 N1 P1        | 0.0355 |
| PC(18:0e/24:2)+H | 856.71  | 9.7195 | C50 H99 O7 N1 P1        | 0.0553 |
| PC(18:1/18:2)+H  | 784.585 | 7.6636 | C44 H83 O8 N1 P1        | 0.8441 |

---

---

|                    |         |         |                         |        |
|--------------------|---------|---------|-------------------------|--------|
| PC(18:1/18:2)+Na   | 806.567 | 7.6661  | C44 H82 O8 N1 P1<br>Na1 | 0.1734 |
| PC(18:1/20:4)+H    | 808.585 | 7.2251  | C46 H83 O8 N1 P1        | 0.0120 |
| PC(18:1/24:2)+H    | 868.679 | 9.5656  | C50 H95 O8 N1 P1        | 0.0278 |
| PC(18:1p/23:0)+H   | 842.699 | 9.4304  | C49 H97 O7 N1 P1        | 0.0127 |
| PC(18:2p/23:0)+H   | 840.684 | 9.1319  | C49 H95 O7 N1 P1        | 0.0002 |
| PC(19:1/18:2)+H    | 798.600 | 7.9628  | C45 H85 O8 N1 P1        | 0.0018 |
| PC(20:0/18:2)+H    | 814.632 | 8.8311  | C46 H89 O8 N1 P1        | 0.0213 |
| PC(20:0e/23:3)+H   | 868.715 | 10.2308 | C51 H99 O7 N1 P1        | 0.0067 |
| PC(20:1/18:2)+H    | 812.616 | 8.3374  | C46 H87 O8 N1 P1        | 0.0400 |
| PC(20:1/18:2)+Na   | 834.598 | 8.2664  | C46 H86 O8 N1 P1<br>Na1 | 0.0114 |
| PC(16:0/18:1)+HCOO | 804.576 | 8.0886  | C43 H83 O10 N1 P1       | 0.4999 |
| PC(16:0/18:2)+HCOO | 802.560 | 7.5912  | C43 H81 O10 N1 P1       | 3.0685 |
| PC(16:0/18:3)+HCOO | 800.544 | 6.9828  | C43 H79 O10 N1 P1       | 0.9623 |
| PC(18:0/18:2)+HCOO | 830.591 | 8.2460  | C45 H85 O10 N1 P1       | 0.1333 |
| PC(18:1/18:1)+HCOO | 830.591 | 8.1124  | C45 H85 O10 N1 P1       | 0.1333 |
| PC(18:1/18:2)+HCOO | 828.576 | 7.5517  | C45 H83 O10 N1 P1       | 0.6124 |
| PC(18:2/18:2)+HCOO | 826.560 | 7.0932  | C45 H81 O10 N1 P1       | 2.1900 |
| PC(18:3/18:2)+HCOO | 824.544 | 6.4809  | C45 H79 O10 N1 P1       | 0.9658 |
| PC(18:3/18:3)+HCOO | 822.529 | 6.0432  | C45 H77 O10 N1 P1       | 0.2230 |
| PC(20:1/18:2)+HCOO | 856.607 | 8.2236  | C47 H87 O10 N1 P1       | 0.0481 |
| PC(20:2/18:2)+HCOO | 854.591 | 7.7409  | C47 H85 O10 N1 P1       | 0.0573 |

---

---

|                    |         |         |                         |         |
|--------------------|---------|---------|-------------------------|---------|
| PC(24:0/18:2)+HCOO | 914.685 | 10.0114 | C51 H97 O10 N1 P1       | 0.0541  |
| Total PC           |         |         |                         | 26.6125 |
| PE(16:0/18:1)+H    | 718.538 | 7.9275  | C39 H77 O8 N1 P1        | 0.0132  |
| PE(16:0/18:1)+Na   | 740.520 | 7.9499  | C39 H76 O8 N1 P1<br>Na1 | 0.0038  |
| PE(16:0/18:2)+H    | 716.522 | 7.5228  | C39 H75 O8 N1 P1        | 1.7225  |
| PE(16:0/18:2)+Na   | 738.504 | 7.5750  | C39 H74 O8 N1 P1<br>Na1 | 0.2441  |
| PE(16:0/20:4)+H    | 740.522 | 6.9995  | C41 H75 O8 N1 P1        | 0.5202  |
| PE(16:0/24:2)+H    | 800.616 | 9.0641  | C45 H87 O8 N1 P1        | 0.0357  |
| PE(16:0/24:2)+Na   | 822.598 | 9.1019  | C45 H86 O8 N1 P1<br>Na1 | 0.0083  |
| PE(16:1/18:2)+H    | 714.506 | 7.1329  | C39 H73 O8 N1 P1        | 0.5384  |
| PE(16:1/18:2)+Na   | 736.488 | 7.0238  | C39 H72 O8 N1 P1<br>Na1 | 0.0509  |
| PE(16:1/20:4)+H    | 738.506 | 6.6449  | C41 H73 O8 N1 P1        | 0.1757  |
| PE(16:1/20:4)+Na   | 760.488 | 6.5492  | C41 H72 O8 N1 P1<br>Na1 | 0.0141  |
| PE(16:1/20:5)+H    | 736.491 | 5.9943  | C41 H71 O8 N1 P1        | 0.0203  |
| PE(16:1/24:2)+H    | 798.600 | 8.7583  | C45 H85 O8 N1 P1        | 0.0079  |
| PE(16:1p/21:6)+Na  | 754.478 | 7.5124  | C42 H70 O7 N1 P1<br>Na1 | 0.0088  |
| PE(17:0/24:2)+H    | 814.632 | 9.3100  | C46 H89 O8 N1 P1        | 0.0171  |
| PE(18:0/18:2)+H    | 744.553 | 8.0480  | C41 H79 O8 N1 P1        | 0.0098  |

---



---

|                  |         |        |                         |        |
|------------------|---------|--------|-------------------------|--------|
| PE(18:0/18:2)+Na | 766.535 | 8.1182 | C41 H78 O8 N1 P1<br>Na1 | 0.0023 |
| PE(18:0/20:4)+H  | 768.553 | 7.7283 | C43 H79 O8 N1 P1        | 0.0250 |
| PE(18:0/24:2)+H  | 828.647 | 9.4810 | C47 H91 O8 N1 P1        | 0.1597 |
| PE(18:0/24:2)+Na | 850.629 | 9.5110 | C47 H90 O8 N1 P1<br>Na1 | 0.0208 |
| PE(18:1/18:2)+H  | 742.538 | 7.5321 | C41 H77 O8 N1 P1        | 0.0756 |
| PE(18:1/20:4)+H  | 766.538 | 7.1979 | C43 H77 O8 N1 P1        | 0.0192 |
| PE(18:1/24:2)+H  | 826.632 | 9.1868 | C47 H89 O8 N1 P1        | 0.0449 |
| PE(18:2/18:2)+H  | 740.522 | 5.4496 | C41 H75 O8 N1 P1        | 0.0316 |
| PE(18:2/18:2)+Na | 762.504 | 5.4650 | C41 H74 O8 N1 P1<br>Na1 | 0.0141 |
| PE(18:3/18:2)+H  | 738.506 | 4.8808 | C41 H73 O8 N1 P1        | 0.0035 |
| PE(18:4/20:5)+H  | 758.475 | 6.0372 | C43 H69 O8 N1 P1        | 0.0013 |
| PE(19:0/24:2)+H  | 842.663 | 9.7464 | C48 H93 O8 N1 P1        | 0.0120 |
| PE(20:0/18:2)+H  | 772.585 | 8.6139 | C43 H83 O8 N1 P1        | 0.0107 |
| PE(20:0/20:4)+H  | 796.585 | 8.2561 | C45 H83 O8 N1 P1        | 0.0046 |
| PE(20:0/24:2)+H  | 856.679 | 9.9154 | C49 H95 O8 N1 P1        | 0.0078 |
| PE(20:1/18:2)+H  | 770.569 | 8.0701 | C43 H81 O8 N1 P1        | 0.0440 |
| PE(16:0/18:1)-H  | 716.523 | 7.9423 | C39 H75 O8 N1 P1        | 0.1115 |
| PE(16:0/18:2)-H  | 714.507 | 7.4163 | C39 H73 O8 N1 P1        | 4.1970 |
| PE(16:0/18:3)-H  | 712.492 | 7.0958 | C39 H71 O8 N1 P1        | 1.4066 |
| PE(16:0/20:4)-H  | 738.507 | 7.1719 | C41 H73 O8 N1 P1        | 1.3551 |

---

---

|                  |         |        |                   |         |
|------------------|---------|--------|-------------------|---------|
| PE(16:0/20:5)-H  | 736.492 | 6.6755 | C41 H71 O8 N1 P1  | 0.5459  |
| PE(17:0/18:2)-H  | 728.523 | 7.8292 | C40 H75 O8 N1 P1  | 0.0206  |
| PE(18:0/18:2)-H  | 742.539 | 8.0437 | C41 H77 O8 N1 P1  | 0.0741  |
| PE(18:1/18:2)-H  | 740.523 | 6.0234 | C41 H75 O8 N1 P1  | 0.0355  |
| PE(18:2/18:2)-H  | 738.507 | 7.0051 | C41 H73 O8 N1 P1  | 1.3551  |
| PE(18:2/23:0)-H  | 812.617 | 9.3068 | C46 H87 O8 N1 P1  | 0.0396  |
| PE(18:3/18:2)-H  | 736.492 | 6.6296 | C41 H71 O8 N1 P1  | 0.5459  |
| PE(18:3/18:3)-H  | 734.476 | 5.9906 | C41 H69 O8 N1 P1  | 0.0974  |
| PE(18:3/20:2)-H  | 764.523 | 7.2046 | C43 H75 O8 N1 P1  | 0.0283  |
| PE(20:0/18:2)-H  | 770.570 | 8.5974 | C43 H81 O8 N1 P1  | 0.0696  |
| PE(20:1/18:2)-H  | 768.554 | 8.0939 | C43 H79 O8 N1 P1  | 0.3282  |
| PE(20:1/18:3)-H  | 766.539 | 7.7528 | C43 H77 O8 N1 P1  | 0.1306  |
| PE(20:2/18:2)-H  | 766.539 | 7.6317 | C43 H77 O8 N1 P1  | 0.1306  |
| PE(22:0/18:2)-H  | 798.601 | 9.0737 | C45 H85 O8 N1 P1  | 0.1873  |
| PE(22:0/18:3)-H  | 796.586 | 8.7469 | C45 H83 O8 N1 P1  | 0.0403  |
| PE(22:1/18:2)-H  | 796.586 | 8.6118 | C45 H83 O8 N1 P1  | 0.0563  |
| PE(24:0/18:2)-H  | 826.633 | 9.4804 | C47 H89 O8 N1 P1  | 0.3832  |
| PE(24:0/18:3)-H  | 824.617 | 9.2000 | C47 H87 O8 N1 P1  | 0.1111  |
| PE(25:0/18:2)-H  | 840.648 | 9.7421 | C48 H91 O8 N1 P1  | 0.0238  |
| PE(26:0/18:2)-H  | 854.664 | 9.9251 | C49 H93 O8 N1 P1  | 0.0187  |
| Total PE         |         |        |                   | 15.1601 |
| PG(16:0/18:1)+Na | 771.514 | 7.0515 | C40 H77 O10 N0 P1 | 0.0072  |

---

---

|                               |         |        |                    |        |
|-------------------------------|---------|--------|--------------------|--------|
|                               |         |        | Na1                |        |
| PG(16:0/18:2)+Na              | 769.499 | 6.5362 | C40 H75 O10 N0 P1  |        |
|                               |         |        | Na1                | 0.0194 |
| PG(16:0/18:2)+NH <sub>4</sub> | 764.543 | 6.5440 | C40 H79 O10 N1 P1  | 0.0075 |
| PG(16:1/18:2)+Na              | 767.483 | 6.0320 | C40 H73 O10 N0 P1  |        |
|                               |         |        | Na1                | 0.0067 |
| PG(16:1/18:2)+NH <sub>4</sub> | 762.528 | 6.0619 | C40 H77 O10 N1 P1  | 0.0024 |
| PG(28:0/16:0)+H               | 891.704 | 9.6322 | C50 H100 O10 N0 P1 | 0.0281 |
| PG(28:0/18:2)+H               | 915.704 | 9.3151 | C52 H100 O10 N0 P1 | 0.0398 |
| PG(28:0/18:3)+H               | 913.689 | 9.0419 | C52 H98 O10 N0 P1  | 0.0294 |
| PG(28:1/16:0)+H               | 889.689 | 9.3903 | C50 H98 O10 N0 P1  | 0.0082 |
| PG(28:1/18:2)+H               | 913.689 | 9.4888 | C52 H98 O10 N0 P1  | 0.0318 |
| PG(28:1/18:3)+H               | 911.673 | 8.7961 | C52 H96 O10 N0 P1  | 0.0151 |
| PEt(16:2/18:2)-H              | 695.465 | 6.9696 | C39 H68 O8 N0 P1   | 2.3571 |
| PG(16:0/16:0)-H               | 721.502 | 6.9472 | C38 H74 O10 N0 P1  | 0.1057 |
| PG(16:0/16:1)-H               | 719.486 | 6.7761 | C38 H72 O10 N0 P1  | 0.0197 |
| PG(16:0/18:1)-H               | 747.518 | 7.0129 | C40 H76 O10 N0 P1  | 0.2484 |
| PG(16:0/18:2)-H               | 745.502 | 6.4888 | C40 H74 O10 N0 P1  | 0.9917 |
| PG(16:0/18:3)-H               | 743.486 | 6.0037 | C40 H72 O10 N0 P1  | 0.5294 |
| PG(16:1/18:1)-H               | 745.502 | 6.8089 | C40 H74 O10 N0 P1  | 0.0756 |
| PG(16:1/18:2)-H               | 743.486 | 6.3103 | C40 H72 O10 N0 P1  | 0.0191 |
| PG(16:1/18:3)-H               | 741.471 | 5.8193 | C40 H70 O10 N0 P1  | 0.0214 |
| PG(18:2/18:2)-H               | 769.502 | 6.0811 | C42 H74 O10 N0 P1  | 0.0404 |

---

---

|                               |         |        |                          |        |
|-------------------------------|---------|--------|--------------------------|--------|
| PG(18:3/18:2)-H               | 767.486 | 5.6014 | C42 H72 O10 N0 P1        | 0.0192 |
| PG(18:3/18:3)-H               | 765.471 | 5.0200 | C42 H70 O10 N0 P1        | 0.0109 |
| PG(37:5/16:0)-H               | 1005.75 | 9.4201 | C59 H106 O10 N0 P1       | 0.4270 |
| PG(37:5/18:2)-H               | 1029.75 | 9.1723 | C61 H106 O10 N0 P1       | 0.4156 |
| PG(37:6/16:0)-H               | 1003.73 | 9.1750 | C59 H104 O10 N0 P1       | 0.2424 |
| Total PG                      |         |        |                          | 5.7192 |
| PI(16:0/18:2)+H               | 835.533 | 6.3015 | C43 H80 O13 N0 P1        | 0.0109 |
| PI(16:0/18:2)+Na              | 857.515 | 6.2989 | C43 H79 O13 N0 P1<br>Na1 | 0.0131 |
| PI(16:0/18:2)+NH <sub>4</sub> | 852.559 | 6.3314 | C43 H83 O13 N1 P1        | 0.0021 |
| PI(16:0/18:3)+H               | 833.517 | 5.7846 | C43 H78 O13 N0 P1        | 0.0095 |
| PI(16:0/20:4)+H               | 859.533 | 5.8850 | C45 H80 O13 N0 P1        | 0.0015 |
| PI(16:1/18:2)+Na              | 855.499 | 5.8105 | C43 H77 O13 N0 P1<br>Na1 | 0.0084 |
| PI(16:1/18:2)+NH <sub>4</sub> | 850.544 | 5.8530 | C43 H81 O13 N1 P1        | 0.0021 |
| PI(26:5/18:2)+H               | 965.611 | 7.2303 | C53 H90 O13 N0 P1        | 0.0110 |
| PI(34:4/16:0)+NH <sub>4</sub> | 1072.77 | 8.9190 | C59 H111 O13 N1 P1       | 0.0415 |
| PI(16:0/18:1)-H               | 835.534 | 6.8286 | C43 H80 O13 N0 P1        | 0.0448 |
| PI(16:0/18:2)-H               | 833.518 | 6.3803 | C43 H78 O13 N0 P1        | 0.7320 |
| PI(16:0/18:3)-H               | 831.502 | 5.8639 | C43 H76 O13 N0 P1        | 0.3594 |
| PI(18:0/18:2)-H               | 861.549 | 6.9881 | C45 H82 O13 N0 P1        | 0.0338 |
| PI(18:0/18:3)-H               | 859.534 | 6.5492 | C45 H80 O13 N0 P1        | 0.0196 |
| PI(18:1/18:2)-H               | 859.534 | 6.3934 | C45 H80 O13 N0 P1        | 0.0187 |

---

---

|                   |         |         |                          |        |
|-------------------|---------|---------|--------------------------|--------|
| PI(18:2/18:2)-H   | 857.518 | 5.8442  | C45 H78 O13 N0 P1        | 0.0620 |
| PI(18:3/18:2)-H   | 855.502 | 5.2857  | C45 H76 O13 N0 P1        | 0.0401 |
| PI(18:3/18:3)-H   | 853.487 | 4.7131  | C45 H74 O13 N0 P1        | 0.0152 |
| Total PI          |         |         |                          | 1.4255 |
| PIP2(18:2/18:2)-H | 1017.45 | 6.5847  | C45 H80 O19 N0 P3        | 0.0173 |
| Total PIP2        |         |         |                          | 0.0173 |
| PMe(18:2/17:2)-H  | 695.465 | 6.7226  | C39 H68 O8 N0 P1         | 2.3571 |
| Total Pme         |         |         |                          | 2.3571 |
| PS(18:0/24:2)+H   | 872.637 | 14.6234 | C48 H91 O10 N1 P1        | 0.0041 |
| PS(29:4/16:0)+Na  | 932.635 | 6.8304  | C51 H92 O10 N1 P1<br>Na1 | 0.2498 |
| PS(29:4/18:0)+Na  | 960.666 | 7.3780  | C53 H96 O10 N1 P1<br>Na1 | 0.0264 |
| PS(29:4/18:3)+Na  | 954.619 | 5.8056  | C53 H90 O10 N1 P1<br>Na1 | 0.2795 |
| PS(31:5/16:0)+H   | 936.668 | 7.6492  | C53 H95 O10 N1 P1        | 0.0289 |
| PS(31:6/16:0)+H   | 934.653 | 7.1641  | C53 H93 O10 N1 P1        | 0.4494 |
| PS(31:6/18:1)+H   | 960.668 | 7.2576  | C55 H95 O10 N1 P1        | 0.0167 |
| PS(31:6/18:2)+H   | 958.653 | 6.7506  | C55 H93 O10 N1 P1        | 0.0850 |
| PS(31:6/22:0)+H   | 1018.74 | 8.7740  | C59 H105 O10 N1 P1       | 0.0139 |
| PS(31:6/24:0)+H   | 1046.77 | 9.1590  | C61 H109 O10 N1 P1       | 0.0581 |
| PS(18:1/18:2)-H   | 784.513 | 7.9528  | C42 H75 O10 N1 P1        | 0.0274 |
| PS(18:2/18:2)-H   | 782.497 | 7.4463  | C42 H73 O10 N1 P1        | 0.7445 |

---

---

|                      |         |         |                   |        |
|----------------------|---------|---------|-------------------|--------|
| PS(18:2/20:4)-H      | 806.497 | 7.0378  | C44 H73 O10 N1 P1 | 0.1872 |
| PS(18:3/18:2)-H      | 780.482 | 7.1469  | C42 H71 O10 N1 P1 | 0.1840 |
| PS(18:3/20:5)-H      | 802.466 | 6.0666  | C44 H69 O10 N1 P1 | 0.0073 |
| PS(20:3/18:2)-H      | 808.513 | 7.5820  | C44 H75 O10 N1 P1 | 0.0335 |
| PS(20:5/18:2)-H      | 804.482 | 6.5439  | C44 H71 O10 N1 P1 | 0.0574 |
| PS(22:3/18:2)-H      | 836.544 | 8.0966  | C46 H79 O10 N1 P1 | 0.0833 |
| PS(22:4/18:2)-H      | 834.529 | 7.6475  | C46 H77 O10 N1 P1 | 0.0341 |
| PS(24:0/18:2)-H      | 870.623 | 14.5720 | C48 H89 O10 N1 P1 | 0.0205 |
| PS(24:2/18:2)-H      | 866.591 | 9.0842  | C48 H85 O10 N1 P1 | 0.0495 |
| PS(26:2/18:2)-H      | 894.623 | 9.4883  | C50 H89 O10 N1 P1 | 0.1147 |
| Total PS             |         |         |                   | 2.7552 |
| SQDG(10:0/22:0)-H    | 793.514 | 6.6071  | C41 H77 O12 S1    | 0.0784 |
| SQDG(10:0/24:1)-H    | 819.529 | 6.6782  | C43 H79 O12 S1    | 0.1091 |
| SQDG(10:0/24:2)-H    | 817.514 | 6.2867  | C43 H77 O12 S1    | 0.1813 |
| SQDG(10:0/24:3)-H    | 815.498 | 5.7710  | C43 H75 O12 S1    | 0.8660 |
| SQDG(10:0/26:3)-H    | 843.529 | 6.3987  | C45 H79 O12 S1    | 0.0862 |
| SQDG(10:0/26:4)-H    | 841.514 | 5.7867  | C45 H77 O12 S1    | 0.0436 |
| SQDG(10:0/26:5)-H    | 839.498 | 5.2161  | C45 H75 O12 S1    | 0.0444 |
| SQDG(10:0/26:6)-H    | 837.482 | 4.7350  | C45 H73 O12 S1    | 0.0950 |
| SQDG(16:0/18:3)-H    | 815.498 | 7.0785  | C43 H75 O12 S1    | 0.0266 |
| SQDG(16:2/18:2)-H    | 813.482 | 6.5243  | C43 H73 O12 S1    | 0.0876 |
| SQDG(17:5/23:2)+HCOO | 937.535 | 8.3677  | C50 H81 O14 S1    | 0.1158 |

---

|                                    |         |         |                |        |
|------------------------------------|---------|---------|----------------|--------|
| SQDG(18:2/18:5)+HCOO               | 881.472 | 6.5465  | C46 H73 O14 S1 | 0.0370 |
| Total SQDG                         |         |         |                | 1.7710 |
| TG(14:0/18:2/18:2)+NH <sub>4</sub> | 844.738 | 10.7764 | C53 H98 O6 N1  | 0.0415 |
| TG(14:0/18:2/18:3)+NH <sub>4</sub> | 842.723 | 10.5199 | C53 H96 O6 N1  | 0.0137 |
| TG(14:0/18:3/18:3)+NH <sub>4</sub> | 840.707 | 10.3065 | C53 H94 O6 N1  | 0.0067 |
| TG(15:0/14:0/16:0)+NH <sub>4</sub> | 782.723 | 11.0752 | C48 H96 O6 N1  | 0.0337 |
| TG(15:0/14:0/16:1)+NH <sub>4</sub> | 780.707 | 10.8697 | C48 H94 O6 N1  | 0.0318 |
| TG(15:0/16:0/16:0)+NH <sub>4</sub> | 810.754 | 11.3016 | C50 H100 O6 N1 | 0.0598 |
| TG(15:0/16:0/16:1)+NH <sub>4</sub> | 808.738 | 11.0700 | C50 H98 O6 N1  | 0.0803 |
| TG(15:0/16:0/18:1)+NH <sub>4</sub> | 836.770 | 11.3147 | C52 H102 O6 N1 | 0.0743 |
| TG(15:0/16:0/24:0)+NH <sub>4</sub> | 922.879 | 12.1691 | C58 H116 O6 N1 | 0.0104 |
| TG(15:0/16:1/16:1)+NH <sub>4</sub> | 806.723 | 10.8724 | C50 H96 O6 N1  | 0.0388 |
| TG(15:0/16:1/18:1)+NH <sub>4</sub> | 834.754 | 11.1100 | C52 H100 O6 N1 | 0.0699 |
| TG(15:0/16:1/24:0)+NH <sub>4</sub> | 920.864 | 11.9977 | C58 H114 O6 N1 | 0.0102 |
| TG(15:0/18:1/18:1)+NH <sub>4</sub> | 862.785 | 11.3398 | C54 H104 O6 N1 | 0.0516 |
| TG(15:0/18:2/18:3)+NH <sub>4</sub> | 856.738 | 10.6958 | C54 H98 O6 N1  | 0.0163 |
| TG(15:1/14:0/16:1)+NH <sub>4</sub> | 778.691 | 10.6411 | C48 H92 O6 N1  | 0.0135 |
| TG(15:1/18:2/18:3)+NH <sub>4</sub> | 854.723 | 10.4622 | C54 H96 O6 N1  | 0.0081 |
| TG(16:0/14:0/14:0)+NH <sub>4</sub> | 768.707 | 10.9052 | C47 H94 O6 N1  | 0.0290 |
| TG(16:0/14:0/16:0)+NH <sub>4</sub> | 796.738 | 11.2990 | C49 H98 O6 N1  | 0.0684 |
| TG(16:0/14:0/16:1)+NH <sub>4</sub> | 794.723 | 10.9324 | C49 H96 O6 N1  | 0.0680 |
| TG(16:0/14:0/23:0)+NH <sub>4</sub> | 894.848 | 11.9898 | C56 H112 O6 N1 | 0.0086 |

---

|                                    |         |         |                |        |
|------------------------------------|---------|---------|----------------|--------|
| TG(16:0/14:0/24:0)+NH <sub>4</sub> | 908.864 | 12.0739 | C57 H114 O6 N1 | 0.0119 |
| TG(16:0/16:0/16:0)+NH <sub>4</sub> | 824.770 | 11.4489 | C51 H102 O6 N1 | 0.0870 |
| TG(16:0/16:0/16:1)+NH <sub>4</sub> | 822.754 | 11.2102 | C51 H100 O6 N1 | 0.1164 |
| TG(16:0/16:0/17:0)+NH <sub>4</sub> | 838.785 | 11.5981 | C52 H104 O6 N1 | 0.0347 |
| TG(16:0/16:0/18:1)+NH <sub>4</sub> | 850.785 | 11.5602 | C53 H104 O6 N1 | 0.2304 |
| TG(16:0/16:0/18:2)+NH <sub>4</sub> | 88.7702 | 11.3238 | C53 H102 O6 N1 | 0.8270 |
| TG(16:0/16:0/18:3)+NH <sub>4</sub> | 846.754 | 11.0922 | C53 H100 O6 N1 | 0.5589 |
| TG(16:0/16:1/16:1)+NH <sub>4</sub> | 820.738 | 11.0978 | C51 H98 O6 N1  | 0.1060 |
| TG(16:0/16:1/17:0)+NH <sub>4</sub> | 836.770 | 11.4541 | C52 H102 O6 N1 | 0.0743 |
| TG(16:0/16:1/18:1)+NH <sub>4</sub> | 848.770 | 11.4567 | C53 H102 O6 N1 | 0.8270 |
| TG(16:0/16:1/24:0)+NH <sub>4</sub> | 934.879 | 12.1339 | C59 H116 O6 N1 | 0.0193 |
| TG(16:0/17:0/18:1)+NH <sub>4</sub> | 864.801 | 11.5654 | C54 H106 O6 N1 | 0.0300 |
| TG(16:0/17:0/18:3)+NH <sub>4</sub> | 860.770 | 11.1555 | C54 H102 O6 N1 | 0.0313 |
| TG(16:0/17:2/18:2)+NH <sub>4</sub> | 858.754 | 10.9221 | C54 H100 O6 N1 | 0.0262 |
| TG(16:0/18:1/18:1)+NH <sub>4</sub> | 876.801 | 11.4710 | C55 H106 O6 N1 | 0.4403 |
| TG(16:0/18:1/18:2)+NH <sub>4</sub> | 874.785 | 11.2382 | C55 H104 O6 N1 | 0.7186 |
| TG(16:0/18:1/18:3)+H               | 855.743 | 11.0453 | C55 H99 O6     | 0.0264 |
| TG(16:0/18:1/22:1)+NH <sub>4</sub> | 932.864 | 11.8966 | C59 H114 O6 N1 | 0.0352 |
| TG(16:0/18:1/24:0)+NH <sub>4</sub> | 962.911 | 12.3180 | C61 H120 O6 N1 | 0.0160 |
| TG(16:0/18:2/18:2)+NH <sub>4</sub> | 872.770 | 11.0043 | C55 H102 O6 N1 | 2.4069 |
| TG(16:0/18:2/18:3)+H               | 853.728 | 10.8372 | C55 H97 O6     | 0.0210 |
| TG(16:0/18:2/18:3)+NH <sub>4</sub> | 870.754 | 10.8880 | C55 H100 O6 N1 | 1.7567 |

---



---

|                                    |         |         |                |        |
|------------------------------------|---------|---------|----------------|--------|
| TG(16:0/18:2/21:0)+NH <sub>4</sub> | 918.848 | 11.8392 | C58 H112 O6 N1 | 0.0139 |
| TG(16:0/18:2/23:0)+NH <sub>4</sub> | 946.879 | 12.0224 | C60 H116 O6 N1 | 0.0084 |
| TG(16:0/18:2/24:0)+NH <sub>4</sub> | 960.895 | 12.1886 | C61 H118 O6 N1 | 0.0222 |
| TG(16:0/18:3/18:3)+H               | 851.712 | 10.6060 | C55 H95 O6     | 0.0120 |
| TG(16:0/18:3/18:3)+NH <sub>4</sub> | 868.738 | 10.6515 | C55 H98 O6 N1  | 0.9137 |
| TG(16:1/14:0/14:1)+NH <sub>4</sub> | 764.676 | 10.4898 | C47 H90 O6 N1  | 0.0081 |
| TG(16:1/14:0/16:1)+NH <sub>4</sub> | 792.707 | 10.7231 | C49 H94 O6 N1  | 0.0340 |
| TG(16:1/14:1/16:1)+NH <sub>4</sub> | 790.691 | 10.5147 | C49 H92 O6 N1  | 0.0083 |
| TG(16:1/16:1/16:1)+NH <sub>4</sub> | 818.723 | 10.7842 | C51 H96 O6 N1  | 0.0365 |
| TG(16:1/16:1/17:1)+NH <sub>4</sub> | 832.738 | 10.9247 | C52 H98 O6 N1  | 0.0236 |
| TG(16:1/18:1/22:0)+NH <sub>4</sub> | 932.864 | 12.0094 | C59 H114 O6 N1 | 0.0352 |
| TG(16:1/18:3/18:3)+NH <sub>4</sub> | 866.723 | 10.3091 | C55 H96 O6 N1  | 0.0170 |
| TG(17:0/18:1/18:1)+NH <sub>4</sub> | 890.817 | 11.6050 | C56 H108 O6 N1 | 0.0151 |
| TG(17:0/18:1/18:2)+NH <sub>4</sub> | 888.801 | 11.3882 | C56 H106 O6 N1 | 0.0188 |
| TG(17:0/18:2/18:2)+NH <sub>4</sub> | 886.785 | 11.1581 | C56 H104 O6 N1 | 0.0258 |
| TG(17:0/18:2/18:3)+NH <sub>4</sub> | 884.770 | 10.9350 | C56 H102 O6 N1 | 0.0249 |
| TG(18:0/16:0/16:0)+NH <sub>4</sub> | 852.801 | 11.6834 | C53 H106 O6 N1 | 0.0405 |
| TG(18:0/16:0/17:0)+NH <sub>4</sub> | 866.817 | 11.8366 | C54 H108 O6 N1 | 0.0114 |
| TG(18:0/16:0/18:0)+NH <sub>4</sub> | 880.832 | 11.8718 | C55 H110 O6 N1 | 0.0193 |
| TG(18:0/16:0/18:1)+NH <sub>4</sub> | 878.817 | 11.7082 | C55 H108 O6 N1 | 0.0721 |
| TG(18:0/18:0/18:1)+NH <sub>4</sub> | 906.848 | 11.9468 | C57 H112 O6 N1 | 0.0254 |
| TG(18:0/18:1/18:1)+NH <sub>4</sub> | 904.832 | 11.7104 | C57 H110 O6 N1 | 0.1198 |

---

---

|                                    |         |         |                |        |
|------------------------------------|---------|---------|----------------|--------|
| TG(18:0/18:1/18:3)+NH <sub>4</sub> | 900.801 | 11.3518 | C57 H106 O6 N1 | 0.4198 |
| TG(18:0/18:2/18:3)+NH <sub>4</sub> | 898.785 | 11.1203 | C57 H104 O6 N1 | 0.8293 |
| TG(18:1/18:1/18:1)+NH <sub>4</sub> | 902.817 | 11.4769 | C57 H108 O6 N1 | 0.2772 |
| TG(18:1/18:1/18:2)+NH <sub>4</sub> | 900.801 | 11.2434 | C57 H106 O6 N1 | 0.4198 |
| TG(18:1/18:2/18:2)+NH <sub>4</sub> | 898.785 | 11.0117 | C57 H104 O6 N1 | 0.8293 |
| TG(18:1/18:2/18:3)+NH <sub>4</sub> | 896.770 | 10.8867 | C57 H102 O6 N1 | 1.9962 |
| TG(18:1/18:2/21:0)+NH <sub>4</sub> | 944.864 | 11.8496 | C60 H114 O6 N1 | 0.0048 |
| TG(18:1/18:2/22:0)+NH <sub>4</sub> | 958.879 | 11.9018 | C61 H116 O6 N1 | 0.0282 |
| TG(18:1/18:2/24:0)+NH <sub>4</sub> | 986.911 | 12.1639 | C63 H120 O6 N1 | 0.0099 |
| TG(18:1/22:1/22:1)+NH <sub>4</sub> | 1014.94 | 12.3311 | C65 H124 O6 N1 | 0.0071 |
| TG(18:2/18:2/18:2)+NH <sub>4</sub> | 896.770 | 10.7694 | C57 H102 O6 N1 | 1.9962 |
| TG(18:2/18:2/21:0)+NH <sub>4</sub> | 942.848 | 11.6612 | C60 H112 O6 N1 | 0.0049 |
| TG(18:2/18:2/23:0)+NH <sub>4</sub> | 970.879 | 11.8692 | C62 H116 O6 N1 | 0.0057 |
| TG(18:3/17:1/18:2)+NH <sub>4</sub> | 882.754 | 10.7179 | C56 H100 O6 N1 | 0.0229 |
| TG(18:3/17:2/18:2)+NH <sub>4</sub> | 880.738 | 10.4518 | C56 H98 O6 N1  | 0.0123 |
| TG(18:3/17:3/18:2)+NH <sub>4</sub> | 878.723 | 10.2058 | C56 H96 O6 N1  | 0.0056 |
| TG(18:3/18:2/18:2)+NH <sub>4</sub> | 894.754 | 10.6502 | C57 H100 O6 N1 | 2.4069 |
| TG(18:3/18:2/18:3)+H               | 875.712 | 10.3508 | C57 H95 O6     | 0.0124 |
| TG(18:3/18:2/18:3)+NH <sub>4</sub> | 892.738 | 10.4081 | C57 H98 O6 N1  | 1.3004 |
| TG(18:3/18:2/20:2)+NH <sub>4</sub> | 922.785 | 10.8345 | C59 H104 O6 N1 | 0.0978 |
| TG(18:3/18:2/22:1)+NH <sub>4</sub> | 952.832 | 11.3121 | C61 H110 O6 N1 | 0.0506 |
| TG(18:3/18:2/23:0)+NH <sub>4</sub> | 968.864 | 11.6665 | C62 H114 O6 N1 | 0.0082 |

---

---

|                                    |         |         |                |        |
|------------------------------------|---------|---------|----------------|--------|
| TG(18:3/18:3/18:3)+NH <sub>4</sub> | 890.723 | 10.1637 | C57 H96 O6 N1  | 0.3867 |
| TG(18:3/18:3/20:2)+NH <sub>4</sub> | 920.770 | 10.6033 | C59 H102 O6 N1 | 0.0362 |
| TG(18:3/18:3/22:1)+NH <sub>4</sub> | 950.817 | 11.1256 | C61 H108 O6 N1 | 0.0237 |
| TG(19:0/18:1/18:3)+NH <sub>4</sub> | 914.817 | 11.4338 | C58 H108 O6 N1 | 0.0074 |
| TG(19:0/18:2/18:3)+NH <sub>4</sub> | 912.801 | 11.2252 | C58 H106 O6 N1 | 0.0198 |
| TG(19:1/18:2/18:3)+NH <sub>4</sub> | 910.785 | 10.9952 | C58 H104 O6 N1 | 0.0084 |
| TG(20:0/18:1/18:2)+NH <sub>4</sub> | 930.848 | 11.7396 | C59 H112 O6 N1 | 0.0582 |
| TG(20:0/18:1/18:3)+NH <sub>4</sub> | 928.832 | 11.6209 | C59 H110 O6 N1 | 0.1654 |
| TG(20:0/18:2/18:3)+NH <sub>4</sub> | 926.817 | 11.3253 | C59 H108 O6 N1 | 0.2190 |
| TG(20:0/18:3/18:3)+NH <sub>4</sub> | 924.801 | 11.2128 | C59 H106 O6 N1 | 0.1848 |
| TG(20:1/18:1/18:2)+NH <sub>4</sub> | 928.832 | 11.4848 | C59 H110 O6 N1 | 0.1654 |
| TG(20:1/18:2/18:3)+NH <sub>4</sub> | 924.801 | 11.0952 | C59 H106 O6 N1 | 0.1848 |
| TG(20:1/18:3/18:3)+NH <sub>4</sub> | 922.785 | 10.9630 | C59 H104 O6 N1 | 0.0978 |
| TG(22:0/18:2/18:2)+NH <sub>4</sub> | 956.864 | 11.7687 | C61 H114 O6 N1 | 0.0719 |
| TG(22:0/18:2/18:3)+NH <sub>4</sub> | 954.848 | 11.6508 | C61 H112 O6 N1 | 0.0633 |
| TG(22:1/18:2/18:2)+NH <sub>4</sub> | 954.848 | 11.5108 | C61 H112 O6 N1 | 0.0633 |
| TG(22:1/18:2/22:1)+NH <sub>4</sub> | 1012.92 | 12.1417 | C65 H122 O6 N1 | 0.0058 |
| TG(24:0/18:2/18:2)+NH <sub>4</sub> | 984.895 | 11.9293 | C63 H118 O6 N1 | 0.0299 |
| TG(24:0/18:2/18:3)+NH <sub>4</sub> | 982.879 | 11.7714 | C63 H116 O6 N1 | 0.0410 |
| TG(24:0/18:3/18:3)+NH <sub>4</sub> | 980.864 | 11.6534 | C63 H114 O6 N1 | 0.0349 |
| TG(24:1/18:2/18:3)+NH <sub>4</sub> | 980.864 | 11.5355 | C63 H114 O6 N1 | 0.0349 |
| TG(24:1/18:3/18:3)+NH <sub>4</sub> | 978.848 | 11.3608 | C63 H112 O6 N1 | 0.0313 |

---

|                                    |         |         |                |         |
|------------------------------------|---------|---------|----------------|---------|
| TG(25:0/15:0/16:0)+NH <sub>4</sub> | 936.895 | 12.2564 | C59 H118 O6 N1 | 0.0129  |
| TG(25:0/16:0/16:1)+NH <sub>4</sub> | 948.895 | 12.1990 | C60 H118 O6 N1 | 0.0117  |
| TG(25:0/16:0/18:1)+NH <sub>4</sub> | 976.926 | 12.3845 | C62 H122 O6 N1 | 0.0100  |
| TG(25:0/16:0/18:3)+NH <sub>4</sub> | 972.895 | 12.0843 | C62 H118 O6 N1 | 0.0032  |
| TG(25:0/16:1/18:1)+NH <sub>4</sub> | 974.911 | 12.2394 | C62 H120 O6 N1 | 0.0056  |
| TG(26:0/15:0/16:0)+NH <sub>4</sub> | 950.911 | 12.4444 | C60 H120 O6 N1 | 0.0094  |
| TG(26:0/16:0/18:1)+NH <sub>4</sub> | 990.942 | 12.4848 | C63 H124 O6 N1 | 0.0053  |
| TG(26:0/16:1/18:1)+NH <sub>4</sub> | 988.926 | 12.3206 | C63 H122 O6 N1 | 0.0122  |
| TG(26:0/18:2/18:3)+NH <sub>4</sub> | 1010.91 | 11.9702 | C65 H120 O6 N1 | 0.0051  |
| TG(8:0/10:0/10:0)+Na               | 549.412 | 7.6257  | C31 H58 O6 Na1 | 0.0064  |
| TG(8:0/8:0/10:0)+Na                | 521.381 | 6.9031  | C29 H54 O6 Na1 | 0.0092  |
| TG(8:0/8:0/10:0)+NH <sub>4</sub>   | 516.425 | 6.9382  | C29 H58 O6 N1  | 0.0027  |
| TG(8:0/8:0/8:0)+Na                 | 493.350 | 6.1315  | C27 H50 O6 Na1 | 0.0034  |
| TG(8:0/8:0/8:0)+NH <sub>4</sub>    | 488.394 | 6.1564  | C27 H54 O6 N1  | 0.0008  |
| Total TG                           |         |         |                | 23.4192 |

**Table S2** Protein profiles of TFEVs.

| Accession number | PTM                                           | Description                                            |
|------------------|-----------------------------------------------|--------------------------------------------------------|
| AJA40947.1       |                                               | 3-Dehydroquinate dehydratase/shikimate dehydrogenase 2 |
| AEC11023.1       |                                               | 40S ribosomal protein s9 partial                       |
| AEC11018.1       |                                               | 60S acidic ribosomal protein p2 partial                |
| AEC11014.1       |                                               | 60S ribosomal protein L9 partial                       |
| ADY38689.1       | Oxidation (M)                                 | Actin                                                  |
| ASR73783.1       | Acetylation (N-term)                          | Acyl-CoA oxidase 3                                     |
| AEC10987.1       | Oxidation (M)                                 | Acyl-CoA-binding protein                               |
| AMR43300.1       |                                               | Alanine aminotransferase 1                             |
| AEC10992.1       | Acetylation (N-term)                          | Alcohol dehydrogenase                                  |
| ABE01246.1       |                                               | Alpha tubulin                                          |
| ABC59068.2       |                                               | Alpha tubulin 1                                        |
| ACF39902.1       | Acetylation (N-term);<br>Oxidation (M)        | Aquaporin                                              |
| AGD98716.1       |                                               | Aquaporin protein 13                                   |
| AHJ09607.1       |                                               | Aquaporin protein 26                                   |
| AGD98711.1       |                                               | Aquaporin protein 8                                    |
| AGG39696.1       | Acetylation (N-term)                          | Aquaporin protein AQU18                                |
| AHB32107.1       | Carbamidomethylation;<br>Acetylation (N-term) | Arginyl-tRNA synthetase-like protein                   |

---

|            |                                                                          |                                          |
|------------|--------------------------------------------------------------------------|------------------------------------------|
| AKP06507.1 |                                                                          | Ascorbate peroxidase                     |
| AHI54569.1 |                                                                          | Ascorbate peroxidase                     |
| AUZ41890.1 |                                                                          | Ascorbate peroxidase                     |
| AHB32105.1 | Carbamidomethylation                                                     | Aspartic proteinase                      |
| AAW57451.1 |                                                                          | ATP synthase alpha subunit partial       |
| ADM92640.1 |                                                                          | ATP synthase CF1 beta subunit partial    |
| ADV04491.1 | Oxidation (M)                                                            | Beta-actin                               |
| AHG94612.1 |                                                                          | Beta-galactosidase                       |
| AHC32021.1 |                                                                          | Beta-galactosidase 3                     |
| ARU79079.1 |                                                                          | Beta-glucosidase 1 GH3 family            |
| ARU79080.1 |                                                                          | Beta-glucosidase 2 GH3 family            |
| CAK97604.2 |                                                                          | Beta-glucosidase-like protein partial    |
| ADN27527.1 |                                                                          | Caffeic acid <i>O</i> -methyltransferase |
| ABP98983.1 | Acetylation ( <i>N</i> -term);<br>Oxidation (M)                          | Caffeine synthase                        |
| ACF93134.1 | Carbamidomethylation;<br>Acetylation ( <i>N</i> -term);<br>Oxidation (M) | Calmodulin                               |
| AFF59215.1 |                                                                          | Cell division cycle protein 48           |
| ADZ28513.1 |                                                                          | Chalcone isomerase                       |
| AHB32112.1 |                                                                          | Chalcone isomerase                       |
| AAO43480.1 |                                                                          | Chalcone synthase partial                |

---

---

|            |                      |                                         |
|------------|----------------------|-----------------------------------------|
| AVA07274.1 |                      | Chlorophyll A/B binding protein 1       |
| AVA07275.1 | Carbamidomethylation | Chlorophyll A/B binding protein 2       |
| AFI98390.1 |                      | Chloroplast stroma ascorbate peroxidase |
| AEE69007.1 |                      | Cinnamyl alcohol dehydrogenase 1        |
| AEE69008.1 |                      | Cinnamyl alcohol dehydrogenase 3        |
| ANN22404.1 |                      | Citrate synthase 1                      |
| AET97662.2 |                      | Copper amine oxidase                    |
| AKN10570.1 |                      | Copper/zinc-superoxide dismutase 1a     |
| ACJ06541.1 | Oxidation (M)        | Cyclophilin                             |
| ABI33223.1 | Oxidation (M)        | Cyclophilin                             |
| BAU24784.1 |                      | CYP74A51                                |
| BAU24783.1 |                      | CYP74B24                                |
| ACN85343.1 | Carbamidomethylation | Cystatin                                |
| AEC11004.1 |                      | Cytochrome b5                           |
| ALE65998.1 |                      | Cytochrome b5                           |
| ALM30765.1 |                      | Cytochrome P450 704C1-like protein      |
| ANN22405.1 |                      | Cytosolic malate dehydrogenase          |
| ADK47516.1 |                      | Cytosolic malate dehydrogenase          |
| ACT10283.1 |                      | Dehydrin                                |
| ACJ65691.1 | Acetylation (N-term) | Dehydrin                                |
| AEW24434.1 | Oxidation (M)        | Dehydrin 1                              |

---

---

|            |                                                                          |                                                   |               |
|------------|--------------------------------------------------------------------------|---------------------------------------------------|---------------|
| ATE88060.1 |                                                                          | Dehydrin protein                                  |               |
| AHB11191.1 |                                                                          | Dehydroascorbate reductase                        |               |
| APC65299.1 | Carbamidomethylation,<br>Acetylation ( <i>N</i> -term),<br>Oxidation (M) | Enolase                                           |               |
| AGH32913.1 |                                                                          | Enoyl-[acyl-carrier-protein] reductase            |               |
| AET97661.1 |                                                                          | Eukaryotic translation initiation factor 5A4      |               |
| AIL29217.1 |                                                                          | Fatty acid beta-oxidation multifunctional protein |               |
| AHE93349.1 |                                                                          | Fructokinase                                      |               |
| ANR94268.1 |                                                                          | Fructokinase 1                                    |               |
| AVX33438.1 | Oxidation (M)                                                            | Fructose -1 6-bisphosphate aldolase               |               |
| AEH04657.1 |                                                                          | Fructose-bisphosphate aldolase                    |               |
| AGB05601.1 |                                                                          | Fructose-bisphosphate aldolase 4                  |               |
| ARO35914.1 |                                                                          | GAD1                                              |               |
| AHC32018.1 |                                                                          | Galactokinase 1                                   |               |
| AGI78462.1 |                                                                          | GDP-mannose-3',5'-epimerase                       |               |
| ARQ80482.1 |                                                                          | Germin-like protein                               |               |
| AFE56212.1 | Acetylation ( <i>N</i> -term)                                            | Glutathione peroxidase                            |               |
| AEC10977.1 | Acetylation ( <i>N</i> -term)                                            | Glutathione peroxidase                            |               |
| AGH32906.1 |                                                                          | Glyceraldehyde-3-phosphate<br>partial             | dehydrogenase |
| AHL69785.1 | Carbamidomethylation,                                                    | Heat shock protein                                |               |

---



---

| Oxidation (M) |                      |                                           |
|---------------|----------------------|-------------------------------------------|
| AEC11021.1    |                      | Heat shock protein 90 partial             |
| AHB32106.1    |                      | Hexokinase                                |
| AFP19448.1    |                      | Hexose transporter                        |
| AEC10950.1    |                      | Histone H2A                               |
| AEC10951.1    | Oxidation (M)        | Histone H2B.2                             |
| AEC10949.1    |                      | Histone H4                                |
| AFQ98370.1    |                      | Hydroxymethylbutenyl diphosphate synthase |
| AEC11027.1    |                      | Hypothetical protein                      |
| AEC11000.1    |                      | Hypothetical protein                      |
| AEC10969.1    |                      | Hypothetical protein                      |
| AEC10970.1    |                      | Hypothetical protein partial              |
| AMQ81181.1    |                      | Isopentenyl diphosphate isomerase         |
| AET97664.1    |                      | Late embryogenesis abundant protein       |
| ACH87174.1    |                      | Late embryogenesis abundant protein       |
| AEW24432.1    |                      | Late embryogenesis abundant protein 3L-1  |
| ADO51752.1    |                      | Lipoxygenase                              |
| AWI98010.1    |                      | Lipoxygenase 6                            |
| AIL29212.1    |                      | Malonyl-CoA:ACP transacylase              |
| AAT68778.2    |                      | Manganese superoxide dismutase            |
| AEO86798.1    | Acetylation (N-term) | Methionine synthase                       |

---

---

|                |                               |                                                                      |
|----------------|-------------------------------|----------------------------------------------------------------------|
| ACH87167.1     | Carbamidomethylation          | Monodehydroascorbate reductase                                       |
| ADK77879.1     |                               | Nucleoside diphosphate kinase                                        |
| AEC10975.1     |                               | Nucleoside diphosphate kinase 1                                      |
| AEN02470.1     |                               | Oxygen-evolving enhancer protein                                     |
| AOF40601.1     |                               | Peptidase S10                                                        |
| ASU87402.1     | Oxidation (M)                 | Phenylalanine ammonia-lyase                                          |
| ASG81459.1     | Oxidation (M)                 | Phenylalanine ammonia-lyase                                          |
| AFS33110.1     |                               | Phosphate transporter                                                |
| AWH66263.1     |                               | Phosphate transporter protein 1 partial                              |
| AEC10983.1     |                               | Phosphatidylglycerol/phosphatidylinositol transfer protein precursor |
| AJK29839.1     | Acetylation ( <i>N</i> -term) | Phosphoenolpyruvate/phosphate translocator partial                   |
| AGH32905.1     |                               | Phosphoglycerate kinase partial                                      |
| YP_009457943.1 |                               | Photosystem I P700 apoprotein A2                                     |
| YP_009047932.1 |                               | Photosystem I P700 chlorophyll A apoprotein A1                       |
| AEC11063.1     |                               | Photosystem I reaction center subunit iv b partial                   |
| AEC11003.1     |                               | Photosystem I reaction center subunit N                              |
| AIG61444.1     |                               | Photosystem II cytochrome b559 alpha subunit                         |
| ASM42254.1     |                               | Photosystem II Qb protein D1                                         |
| ABE01395.1     |                               | Phragmoplastin                                                       |

---

---

|            |                               |                                                                       |
|------------|-------------------------------|-----------------------------------------------------------------------|
| ANT95298.1 |                               | Plasma membrane H <sup>+</sup> -ATPase partial                        |
| ACE06753.1 |                               | Plastid acyl carrier protein                                          |
| ABM66381.1 | Acetylation ( <i>N</i> -term) | Pollen coat-like protein                                              |
| BAA34937.1 |                               | PR-1 like protein                                                     |
| ANN22410.1 |                               | Purple acid phosphatase 26                                            |
| ANN22411.1 | Carbamidomethylation          | Purple acid phosphatase 29                                            |
| ACV60359.1 |                               | Putative glucose-6-phosphate/phosphate translocator                   |
| BAM28753.1 |                               | Putative peroxidase partial                                           |
| ACV60361.2 | Carbamidomethylation          | Putative type 2 ribosome-inactivating protein                         |
| ANN22403.1 |                               | Pyrophosphate-energized vacuolar membrane proton pump 1               |
| AKQ62850.1 |                               | Raffinose synthase 1                                                  |
| ACV60360.1 |                               | RD22-like protein                                                     |
| AEC10961.1 |                               | Ribosomal protein s28                                                 |
| AAL60364.1 |                               | Ribulose-1 5-bisphosphate carboxylase/oxygenase large subunit partial |
| CAB83039.1 |                               | <i>S</i> -Adenosylmethionine synthetase                               |
| AEC11046.1 |                               | <i>S</i> -Adenosylmethionine synthetase 1 partial                     |
| ACN76858.1 |                               | Seed ripening regulated protein                                       |
| ACH87168.1 |                               | Senescence-related protein                                            |
| AIL29794.1 |                               | Short-chain dehydrogenase-like protein                                |

---

---

|            |                               |                                                     |
|------------|-------------------------------|-----------------------------------------------------|
| AKQ62964.1 |                               | Sucrose non-fermenting-1-related protein kinase 2.8 |
| AHE93347.1 |                               | Sucrose phosphate synthase 1                        |
| AHL29281.1 | Acetylation ( <i>N</i> -term) | Sucrose synthase 1                                  |
| AHL29282.1 |                               | Sucrose synthase 2                                  |
| ALE20417.1 |                               | Sulfate transporter 3.5                             |
| AFE56211.1 |                               | Terpene synthase                                    |
| ANB66346.1 | a                             | Terpene synthase 3                                  |
| ABE01396.1 |                               | Thaumatococcus-like protein                         |
| AGH33875.1 |                               | Transketolase                                       |
| AGH32904.1 |                               | Translation elongation factor 1-alpha partial       |
| ADY38691.1 |                               | Ubiquinol-cytochrome <i>c</i> reductase complex     |
| AEC10952.1 |                               | Ubiquitin fusion protein                            |
| AIF73143.1 | Acetylation ( <i>N</i> -term) | Ubiquitin-like family protein                       |
| AEH04658.1 |                               | UDP-glucuronate decarboxylase                       |
| ALO19883.1 |                               | UDP-glycosyltransferase 91Q1                        |
| AUP37380.1 |                               | UDP-L-rhamnose synthase partial                     |
| CAY32869.1 | Oxidation (M)                 | Unnamed protein product                             |
| CBN69845.1 |                               | Unnamed protein product                             |
| ADY38690.1 |                               | Vacuolar ATP synthase subunit                       |
| ARE30654.1 |                               | Vacuolar invertase INV9                             |

---



**Table S3** Evaluation of the standard hematology markers for mice receiving various treatments.

| Name?               | Health control     | TFEPs (i.v., high)   | TFEPs (oral, high) |
|---------------------|--------------------|----------------------|--------------------|
| WBC ( $10^9/L$ )    | $3.84 \pm 0.54$    | $4.82 \pm 0.82$      | $4.16 \pm 0.29$    |
| Lymph ( $10^9/L$ )  | $2.56 \pm 0.71$    | $3.82 \pm 0.81$      | $3.14 \pm 0.21$    |
| Mon ( $10^9/L$ )    | $0.12 \pm 0.02$    | $0.14 \pm 0.02$      | $0.14 \pm 0.02$    |
| Gran ( $10^9/L$ )   | $0.76 \pm 0.07$    | $0.86 \pm 0.11$      | $0.88 \pm 0.08$    |
| RBC ( $10^{12}/L$ ) | $7.58 \pm 0.20$    | $6.96 \pm 0.26$      | $8.16 \pm 0.37$    |
| HGB (g/L)           | $109.40 \pm 2.69$  | $96.80 \pm 3.97$     | $119.8 \pm 4.76$   |
| HCT (%)             | $37.18 \pm 0.96$   | $33.36 \pm 1.30$     | $40.32 \pm 1.57$   |
| MCV (fL)            | $49.10 \pm 0.38$   | $48.02 \pm 0.36$     | $49.58 \pm 0.57$   |
| MCH (pg)            | $14.40 \pm 0.17$   | $13.86 \pm 0.18$     | $14.68 \pm 0.18$   |
| MCHC (g/L)          | $293.80 \pm 1.59$  | $287.80 \pm 3.01$    | $296.60 \pm 1.21$  |
| PLT ( $10^9/L$ )    | $829.80 \pm 61.29$ | $1033.60 \pm 150.79$ | $843.40 \pm 26.33$ |
| MPV (fL)            | $5.84 \pm 0.15$    | $6.50 \pm 0.15$      | $5.86 \pm 0.12$    |

Data representative mean  $\pm$  S.E.M. ( $n=5$ ).

TFENs, exosome-like NPs from tea flowers; i.v., intravenous injection; WBC, white blood cell count; Lymph, lymphocyte; Mon, monocytes; Gran, neutrophilicgranulocyte; RBC, red blood cell; HGB, hemoglobin; HCT, hematocrit; MCV, mean corpuscular volume; MCH, mean corpuscular hemoglobin; MCHC, mean corpuscular hemoglobin concentration; PLT, platelet count; MPV, mean platelet volume.
